# Supplementary material for: Condensin II mutation causes T-cell lymphoma through tissue-specific genome instability
Source: PubMed Central journal article supplement — Genes Dev. 2016 Oct 1;30(19):2173–86. doi: 10.1101/gad.284562.116 (PMC5088566; doi:10.1101/gad.284562.116), 2016-10-01
Supplement: supp_gad.284562.116_Supplemental_Data.pdf [file supp_gad.284562.116_Supplemental_Data.pdf]

**Supplemental files for Woodward *et al*: “Condensin II mutation causes T cell lymphoma through tissue-specific genome instability”**

- Figure S1:** Missense mutations in *Caph2* induce thymic lymphoma
- Figure S2:** Absence of interphase chromatin decompaction in *Caph2*<sup>nes/nes</sup> T cells
- Figure S3:** Transcriptional response to *Caph2* mutation in premalignant DP cells
- Figure S4:** The *Caph2*<sup>nes/nes</sup> phenotype is reproduced in *ex vivo* primary T cell cultures.
- Figure S5:** *Caph2* mutation impairs ploidy maintenance in proliferating T, but not B cells.
- Figure S6:** Gating strategies for cell populations analysed in Figure 4 and Figure S5.
- Figure S7:** *Caph2* mutant thymocytes show DNA damage in early G1
- Figure S8:** *Caph2* mutation induces activation of P53-responsive genes
- Figure S9:** Copy number profiling of tumours from *Caph2* and *P53* mutant mice.
- Figure S10:** *Caph2*<sup>nes/nes</sup> tumours are near diploid, not tetraploid
- Table S1:** Full list of gene ontology terms for DP CD71+ transcriptome comparisons
- Table S2:** Full list of gene ontology terms for DP CD71- transcriptome comparisons

- Table S3:** P53 pathway qRT-PCR data
- Table S4:** Highest ranked deletions in *Caph2*<sup>nes/nes</sup> tumours
- Table S5:** Cell surface markers used to define haematopoietic cell populations
- Table S6:** Antibodies used in this study
- Table S7:** FISH probes and oligonucleotides used in this study
- Table S8:** Full list of gene ontology terms for *Caph2*<sup>nes/nes</sup> DP CD71-FSC<sup>lo</sup> vs FSC<sup>hi</sup> transcriptome comparisons

A

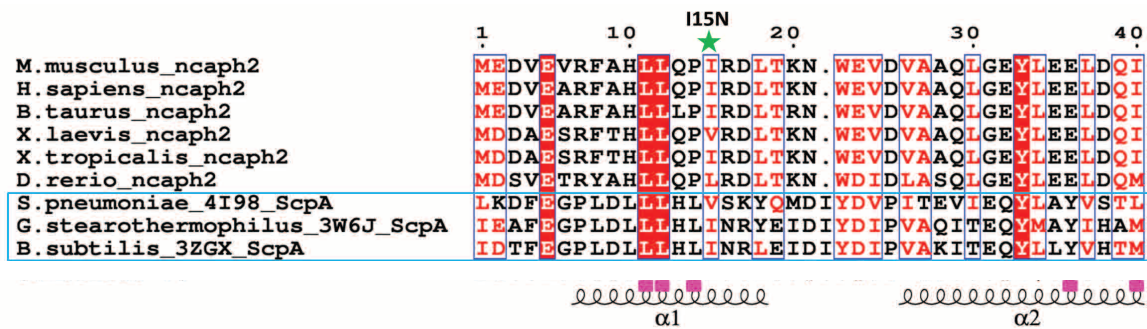

B

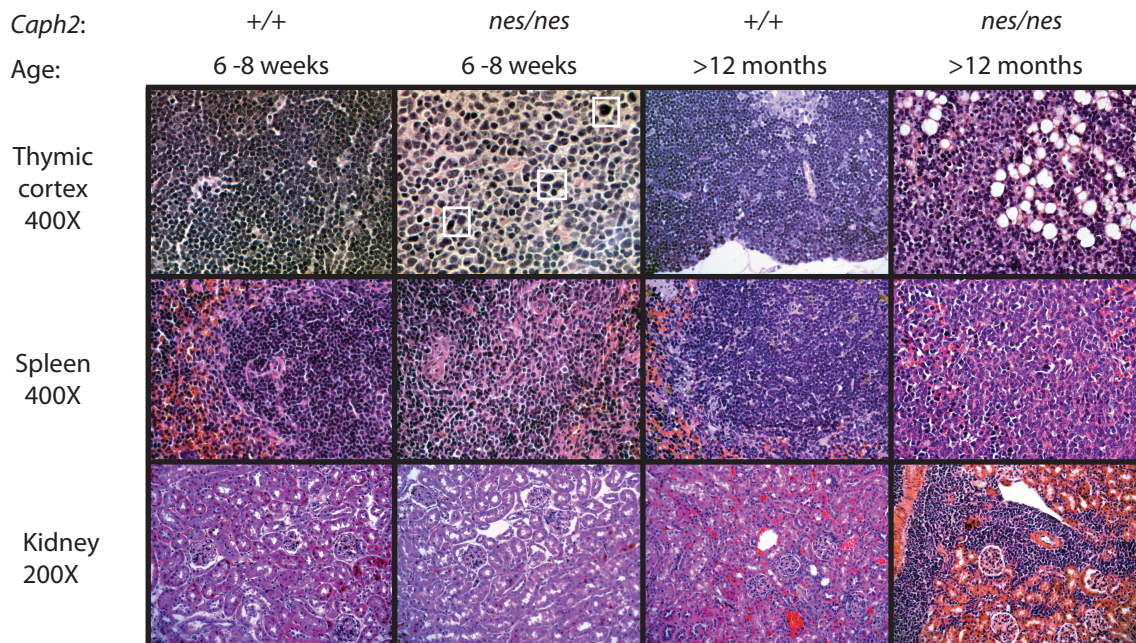

### Figure S1: Missense mutations in *Caph2* induce thymic lymphoma

**A.** Multiple sequence alignment of the conserved N-terminal region from vertebrate *Caph2* with bacterial *ScpA* sequences of known structure (within cyan box). The position of the mouse *Caph2<sup>nes</sup>* mutation I15N is indicated (green star) and the residues involved in hydrophobic interactions with the equivalent I22 amino acid residue in *B. subtilis* (Bürmann et al. 2013) (Figure 1B) are shown with a solid pink block below the alignment. Positions of the two N-terminal alpha-helices are shown at the bottom.

**B.** Haematoxylin and Eosin stained sections cut from formalin-fixed paraffin-embedded tissues from young adult wildtype and *Caph2<sup>nes/nes</sup>* animals. Note the accumulation of large, atypical nuclei (white boxes) in the *Caph2<sup>nes/nes</sup>* thymus in place of small CD4<sup>+</sup>CD8<sup>+</sup> cell nuclei. Reduced density of mature T lymphocytes is also evident in the periarteriolar lymphoid sheaths of the spleen. In aged *Caph2<sup>nes/nes</sup>* animals, lymphoma cells can be clearly seen in the thymus (infiltrating adjacent fat), spleen (effacing the normal architecture), and infiltrating the kidney parenchyma. Images are representative of three or more animals.

### Figure S1: Missense mutations in *Caph2* induce thymic lymphoma

**A.** Multiple sequence alignment of the conserved N-terminal region from vertebrate *Caph2* with bacterial *ScpA* sequences of known structure (within cyan box). The position of the mouse *Caph2*<sup>nes</sup> mutation I15N is indicated (green star) and the residues involved in hydrophobic interactions with the equivalent I22 amino acid residue in *B. subtilis* (Bürmann et al. 2013) (Figure 1B) are shown with a solid pink block below the alignment. Positions of the two N-terminal alpha-helices are shown at the bottom. **B.** Haematoxylin and Eosin stained sections cut from formalin-fixed paraffin-embedded tissues from young adult wildtype and *Caph2*<sup>nes/nes</sup> animals. Note the accumulation of large, atypical nuclei (white boxes) in the *Caph2*<sup>nes/nes</sup> thymus in place of small CD4<sup>+</sup>CD8<sup>+</sup> cell nuclei. Reduced density of mature T lymphocytes is also evident in the periarteriolar lymphoid sheaths of the spleen. In aged *Caph2*<sup>nes/nes</sup> animals, lymphoma cells can be clearly seen in the thymus (infiltrating adjacent fat), spleen (effacing the normal architecture), and infiltrating the kidney parenchyma. Images are representative of three or more animals.



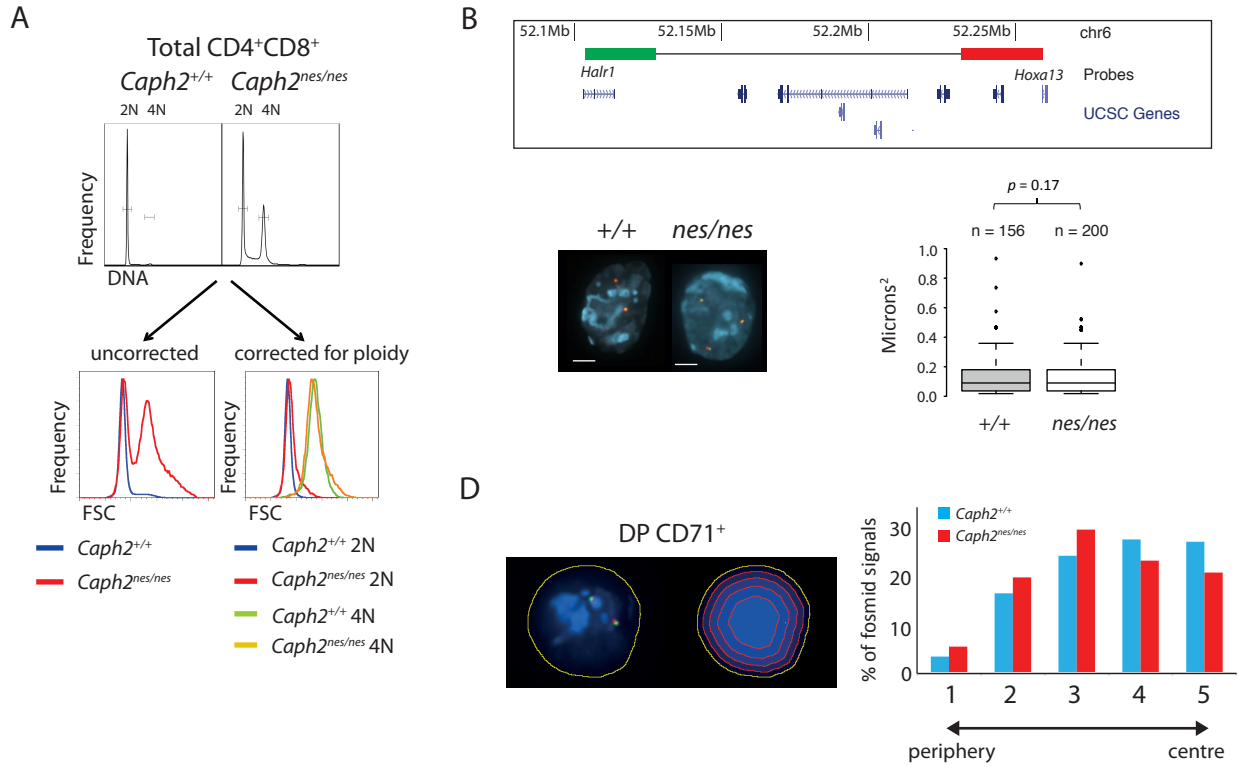

**C**

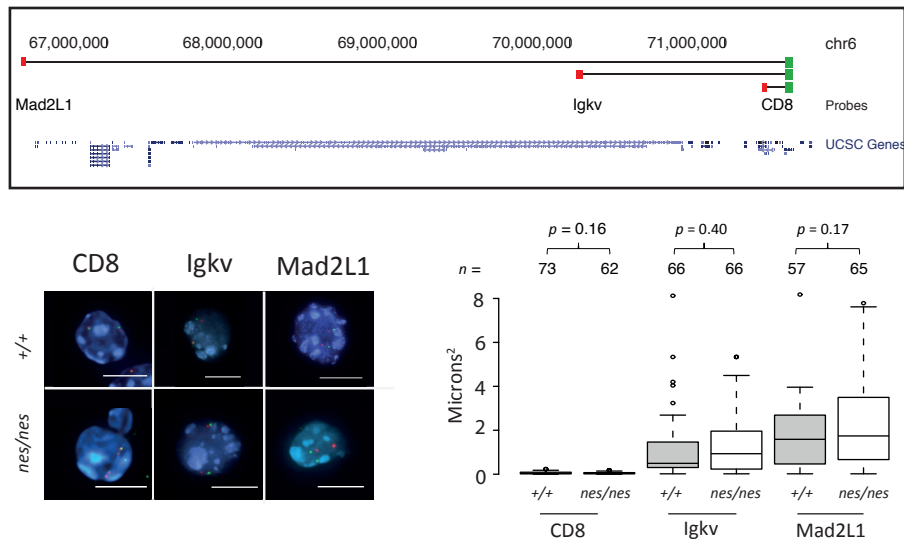

## Figure S2: Absence of interphase chromatin decompaction in

### *Caph2*<sup>nes/nes</sup> T cells

**A.** Flow Cytometry DNA content histograms gated on total CD4<sup>+</sup>CD8<sup>+</sup> thymocytes, including both blast (CD71<sup>+</sup>) and quiescent (CD71<sup>-</sup>) subsets (top). Comparisons between Forward Scatter (FSC) profiles of wildtype and mutant cells are shown either for all cells (uncorrected), or for populations with identical DNA content (corrected for ploidy)(bottom). **B.** 3D FISH using pairs of fosmids spanning the *HoxA* locus (shown in UCSC browser track above the images) to probe FACS-purified DP CD71<sup>+</sup> nuclei (middle) from wild-type or *Caph2*<sup>nes/nes</sup> mice. Scale bar = 2μM. Boxplots depict squared interprobe distances, including median, interquartile range, 95<sup>th</sup> percentile and outlier values. Probe details are listed in Table S7. *p*-values represent Mann-Whitney U-tests. **C.** Distribution of *HoxA* probe hybridisation signals across five concentric shells eroded from the nuclear periphery (shell 5) to the centre (shell 1) of DP CD71<sup>+</sup> thymocytes (*n* = 100 chromosomes per genotype). Differences in the signal distribution were not significant (Chi<sup>2</sup> *P* > 0.05). **D.** 3D FISH using pairs of fosmids separated by 0.1Mb, 1Mb and 5Mb at the *CD8* locus. Scale bar = 5μM. Data are presented as described in panel B.

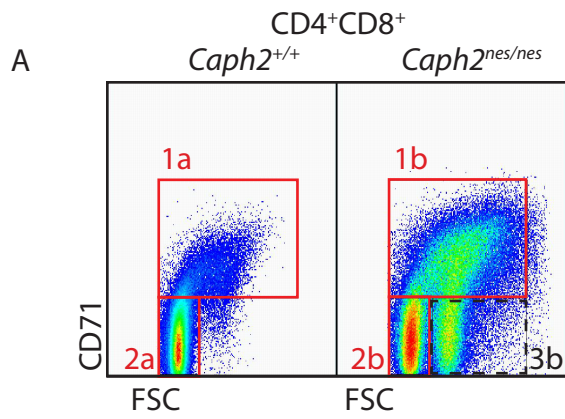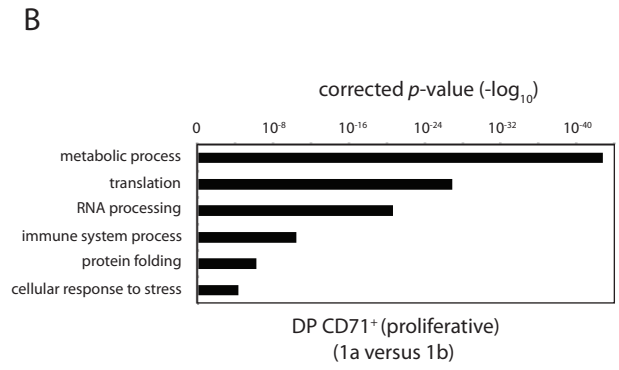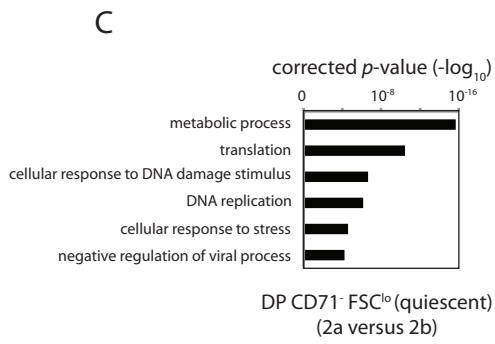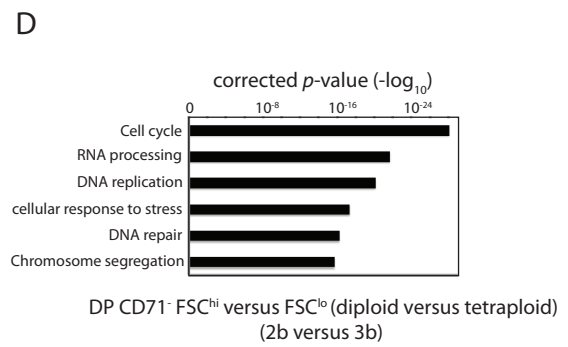

## Figure S3

### Transcriptional response to *Caph2* mutation in premalignant DP cells

**A.** Flow cytometry dot plot, gated on CD4<sup>+</sup>CD8<sup>+</sup> (DP) thymocytes, showing the gating scheme used to purify DP cell subsets for transcriptome studies. 1a and 1b correspond to proliferative (CD71<sup>+</sup>) DP cells and 2a and 2b correspond to DP quiescent cells in a diploid G0 cell cycle phase. The CD71<sup>lo</sup>FSC<sup>hi</sup> population present in the *Caph2* mutant, but not wildtype thymus, represents tetraploid cells which arise from mitotic failure, as shown in Figure 6. Because the microarray studies were designed to look for direct effects of *Caph2* mutation on transcription, rather than indirect transcriptional responses to mitotic failure, these tetraploid cells were excluded from gates 2a and 2b. However, CD71<sup>lo</sup>FSC<sup>hi</sup> tetraploid cells from *Caph2*<sup>nes/nes</sup> thymus were also sorted separately (3b) for the identification of differentially expressed transcripts relative to CD71<sup>lo</sup>FSC<sup>lo</sup> diploid cells from the same organ (panel D). Total DP CD71<sup>-</sup> cells were used to assess P53 pathway activation in Figure S8. **B.** Histograms showing representative gene ontology terms enriched among genes upregulated in stage-matched *Caph2*<sup>nes/nes</sup> versus *Caph2*<sup>+/+</sup> DP CD71<sup>+</sup> thymocytes, determined using the GOrilla tool. *p* values are corrected for multiple testing using the Benjamini-Hochberg method. **C.** Histograms presented as described above, showing gene ontology term enrichments among genes upregulated in DP CD71<sup>-</sup>FSC<sup>lo</sup> thymocytes from *Caph2*<sup>nes/nes</sup> versus wildtype thymus. **D.** Histograms presented as above showing gene ontology term enrichment for genes upregulated in DP CD71<sup>-</sup>FSC<sup>lo</sup> versus DP CD71<sup>-</sup>FSC<sup>hi</sup> thymocytes from

*Caph2*<sup>nes/nes</sup> animals. Complete lists of enriched terms from gene ontology analyses depicted in panels B, C and D are given in Table S1, S2 and S8, respectively.

A

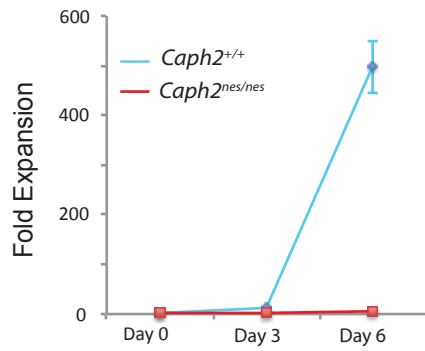

B

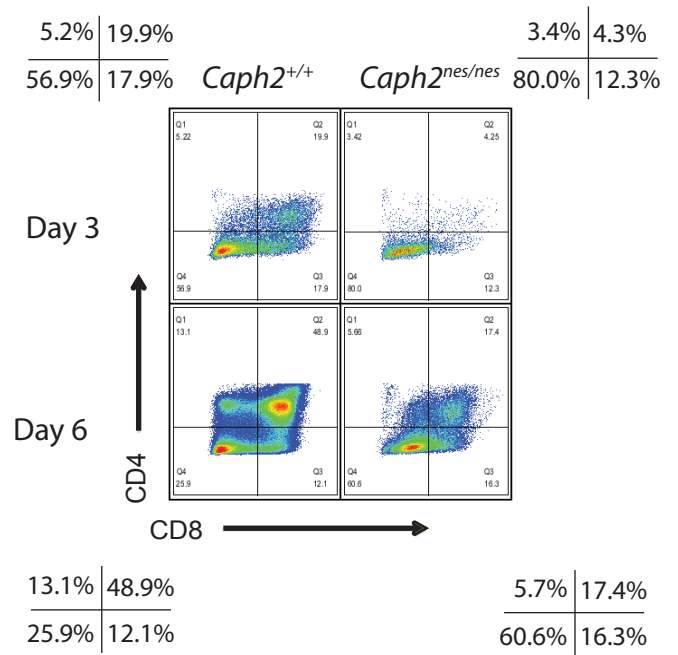

C

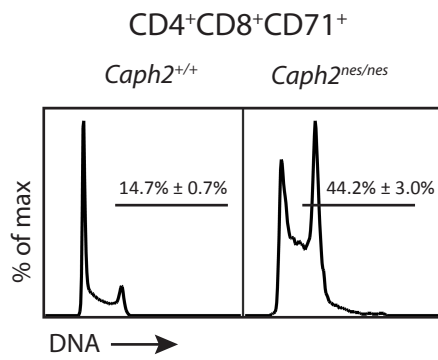



**Figure S4: The *Caph2*<sup>nes/nes</sup> phenotype is reproduced in *ex vivo* primary T cell cultures.**

**A.** Proliferation curves for primary DN3 thymocytes cultured on monolayers of OP9-DL1 stromal cells (de Pooter and Zúñiga-Pflücker 2007). Error bars show SEM of  $n = 3$  biological replicate experiments. **B.** Differentiation status of T cell cultures from panel A. Percentages represent mean values from biological triplicates. **C.** DNA content analysis of freshly isolated DP CD71<sup>+</sup> thymocytes from neonatal *Caph2*<sup>nes/nes</sup> and control animals. The percentage of cells with 4N, or greater than 4N DNA content is indicated ( $\pm$  SEM,  $n = 3$  biological replicates).

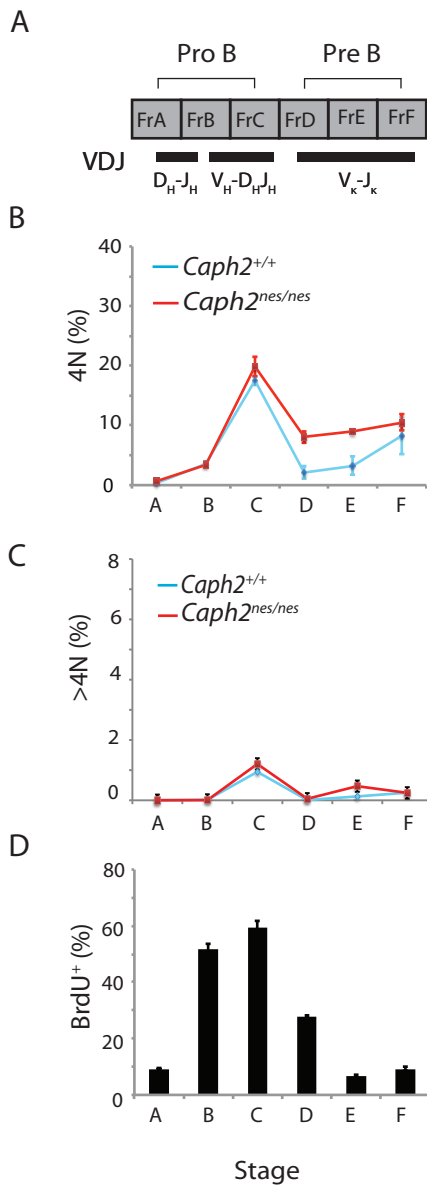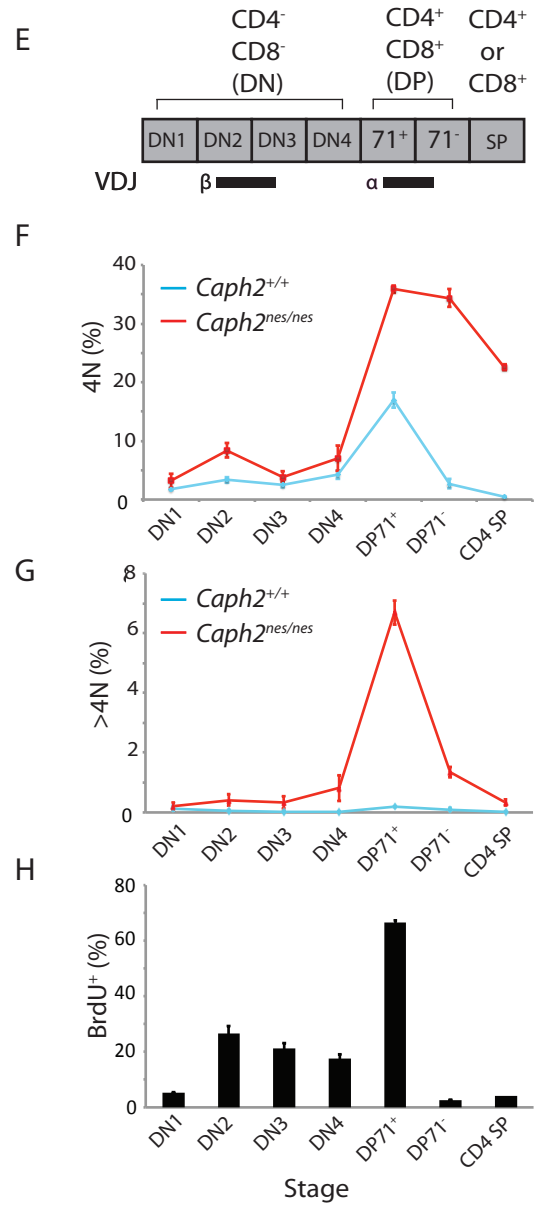

**Figure S5: *Caph2* mutation impairs ploidy maintenance in proliferating T, but not B cells.**

**A & E.** Schematic of the major stages of bone marrow B (A) and thymic T (E) cell differentiation in young adult mice, arranged in chronological sequence. Horizontal black bars show the timing of VDJ recombination events. Cell surface marker and antibody combinations used to distinguish cell populations are listed in Tables S3 & S4, and gating schemes are in Figure S6. **B & F.** The percentage of *wildtype* (blue) and *Caph2*<sup>nes/nes</sup> (red) cells with 4N DNA content at each of the stages shown in panels A & E, as determined by flow cytometric (FC) quantification of DAPI fluorescence. DAPI histograms for each stage are shown in Figure 4. **C & G.** Percentage of cells with greater than 4N (hyperdiploid) DNA content during lymphocyte differentiation, depicted as above. **D & H.** The fraction of actively cycling cells at each stage of lymphocyte differentiation in wildtype animals, determined by FC quantification of BrdU 2 hours following intraperitoneal BrdU injection. Error bars represent SEM for ploidy (n = 4 biological replicates) and BrdU (n = 3 biological replicates for B cell populations, n = 6 biological replicates for T cells)

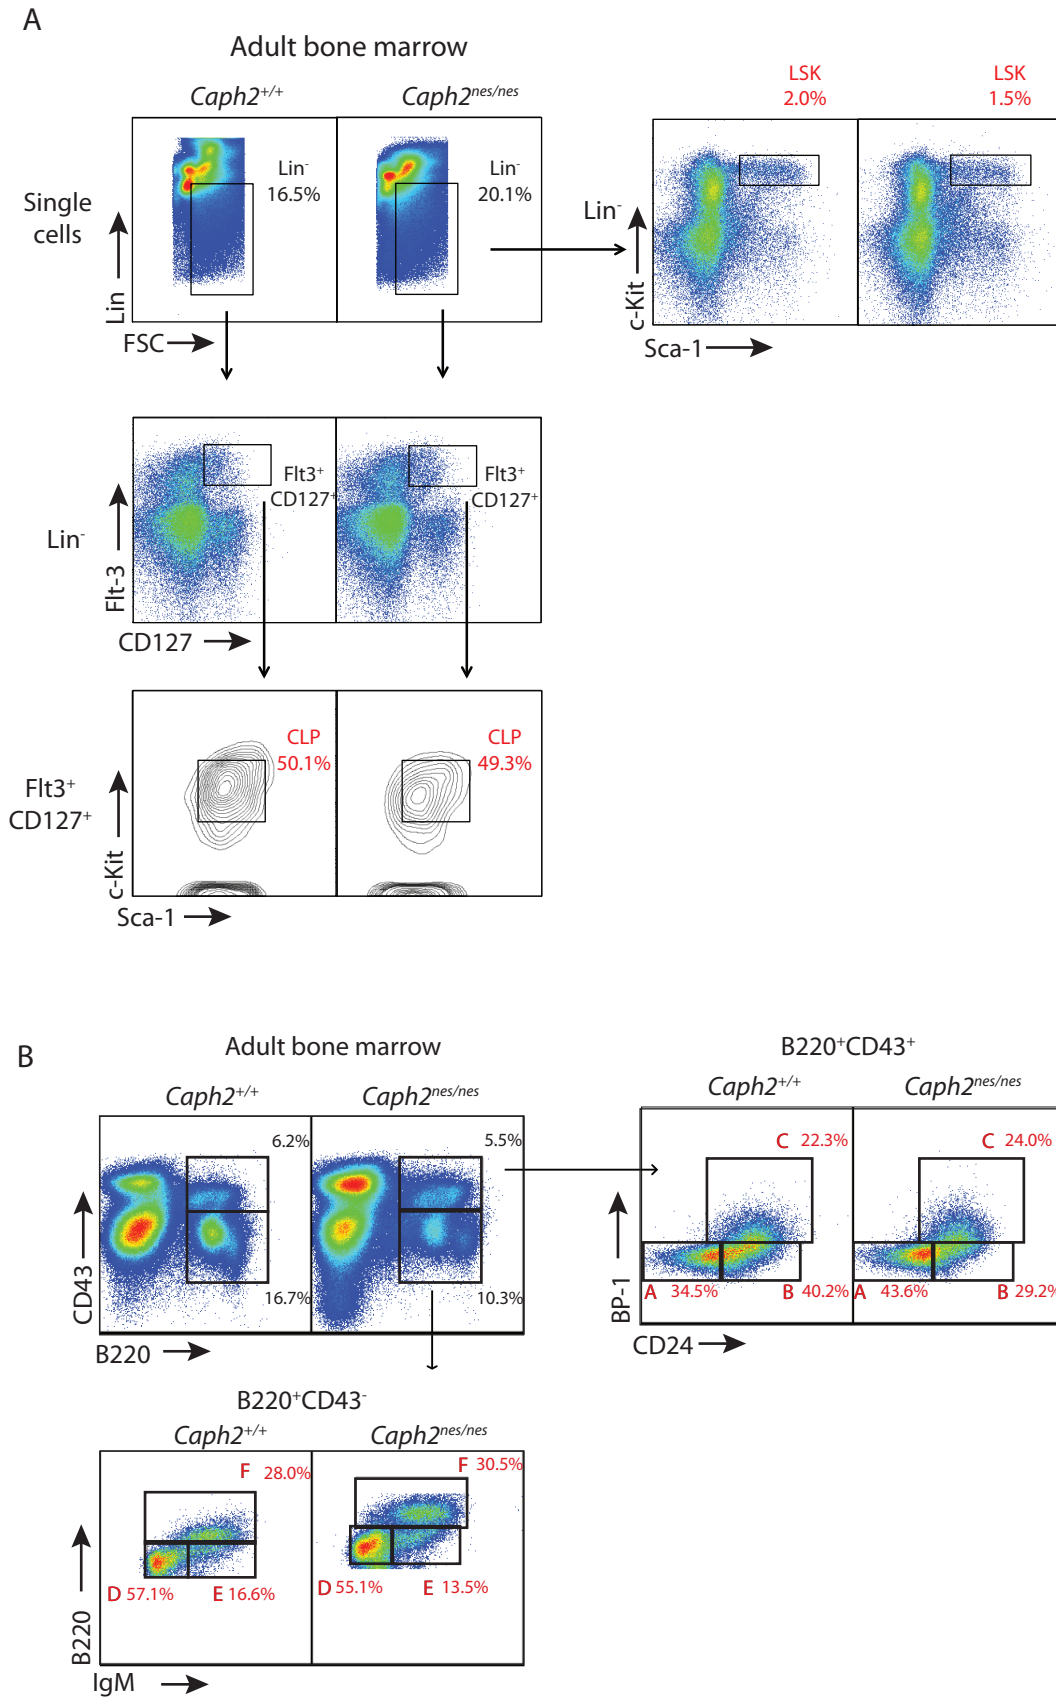

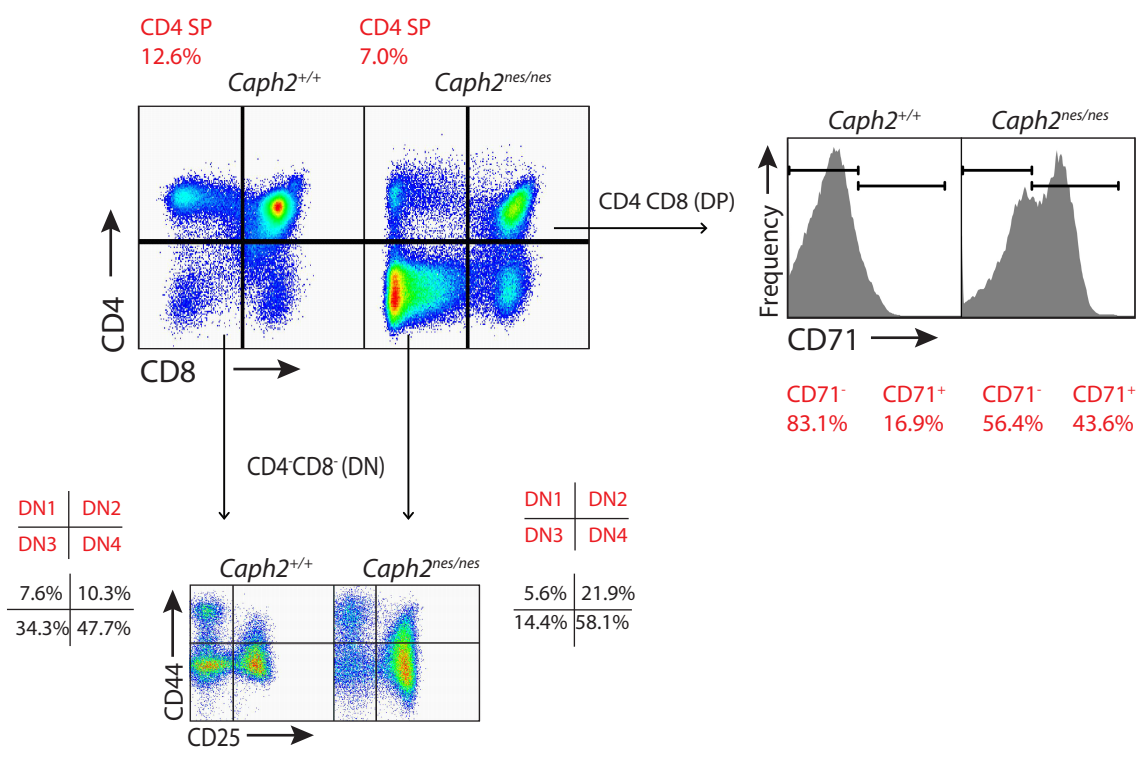

**Figure S6: Gating strategies for cell populations analysed in Figure 4 and Figure S5.**

**A.** Multipotent haematopoietic progenitor populations: LSK (Lin<sup>-</sup>, Sca-1<sup>+</sup>, c-kit<sup>+</sup>) and Common Lymphoid Progenitor (CLP). Dot plots are pre-gated on single cells from whole bone marrow tissue of young adult animals. **B.** Gating Strategy for bone marrow B cell populations. Dot plots are pre-gated on single cells from whole bone marrow tissue of young adult animals. **C.** Gating strategy for thymic T cell populations. Dot plots are pre-gated on single cells from whole thymic tissue of young adult animals. For panels A – C, mean percentages of parent population are shown, calculated from a minimum of 3 biological replicates in each case. Antibody details are listed in Table S6.



A

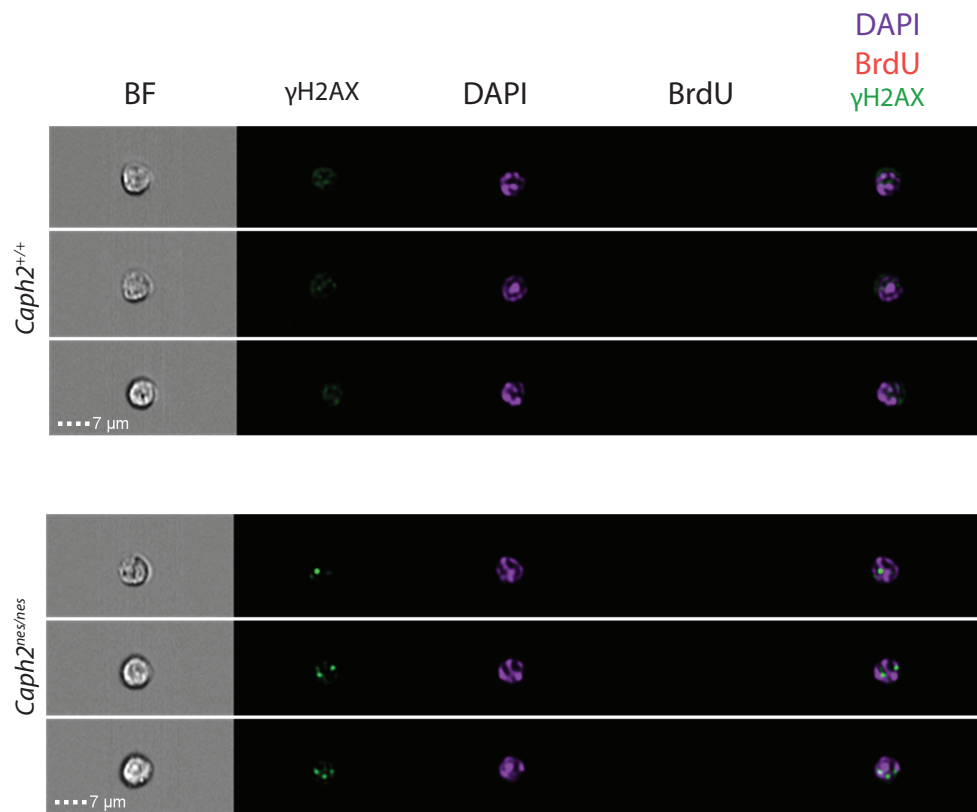

B

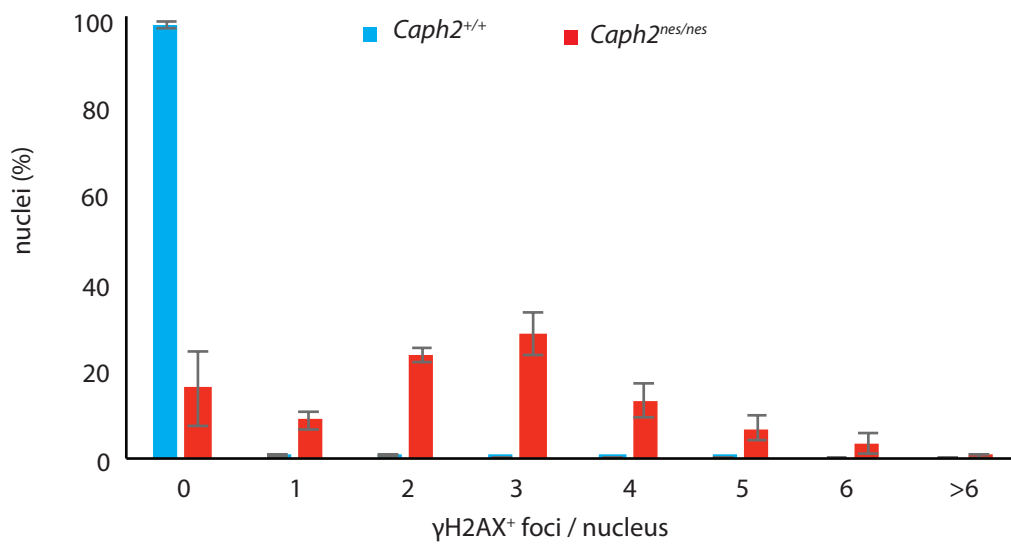

**Figure S7: *Caph2* mutant thymocytes show DNA damage in early G1**

**A.** Multispectral images showing representative cells from the smallest 25% of the G1 (2N, BrdU<sup>-</sup>) thymocyte population. Images were acquired on an ImageStream Flow Cytometer using a 60X objective. **B.** Histogram shows the frequency of  $\gamma$ H2AX foci per nucleus for the smallest 20% of G1 cells. Error bars show SEM of  $n = 3$  biological replicate experiments, with the gated population comprising at least 450 cells per experiment.

A

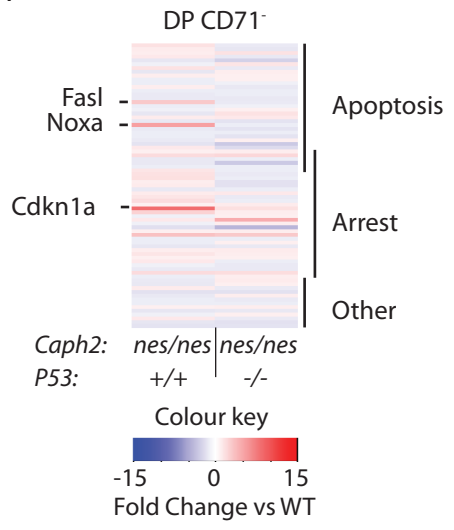

B

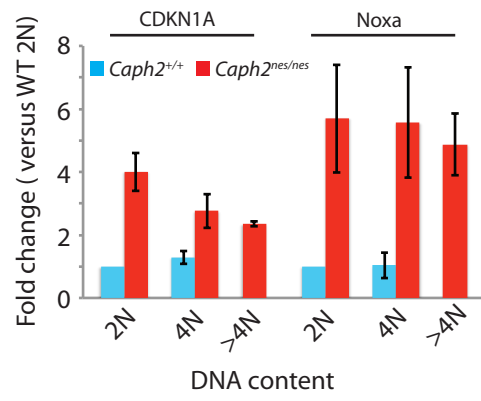

**Figure S8: *Caph2* mutation induces activation of P53-responsive genes**

**A.** Heat maps show fold change in mRNA expression for known P53 pathway genes in *Caph2*<sup>nes/nes</sup> and *Caph2*<sup>nes/nes</sup> *P53*<sup>-/-</sup> mutants relative to matched wildtype cells, measured by qRT-PCR array (SABioscience). RNA was purified from CD4<sup>+</sup>CD8<sup>+</sup> CD71<sup>-</sup> thymocytes, ie. cells that have ceased proliferation after  $\beta$ -selection (gating shown in Figure S3A). Three genes showing robust (>2.5-fold) P53-dependent upregulation in *Caph2*<sup>nes/nes</sup> cells are indicated, and a full list of fold change values is detailed in Table S3. Data are from two independent samples, each with two technical replicates. **B.** qRT-PCR analysis of the P53 target genes *CDKN1A* and *NOXA* in CD4<sup>+</sup>CD8<sup>+</sup> thymocytes that were FACS-purified based on DNA content (Hoechst). Data were normalised to  $\beta$ -actin, and are represented as fold change relative to *Caph2*<sup>+/+</sup> 2N. Cells with >4N ploidy were rare in wildtype animals, and were therefore assessed only in *Caph2*<sup>nes/nes</sup>. Error bars represent SEM from two independent experiments, each comprising two technical replicates.

A

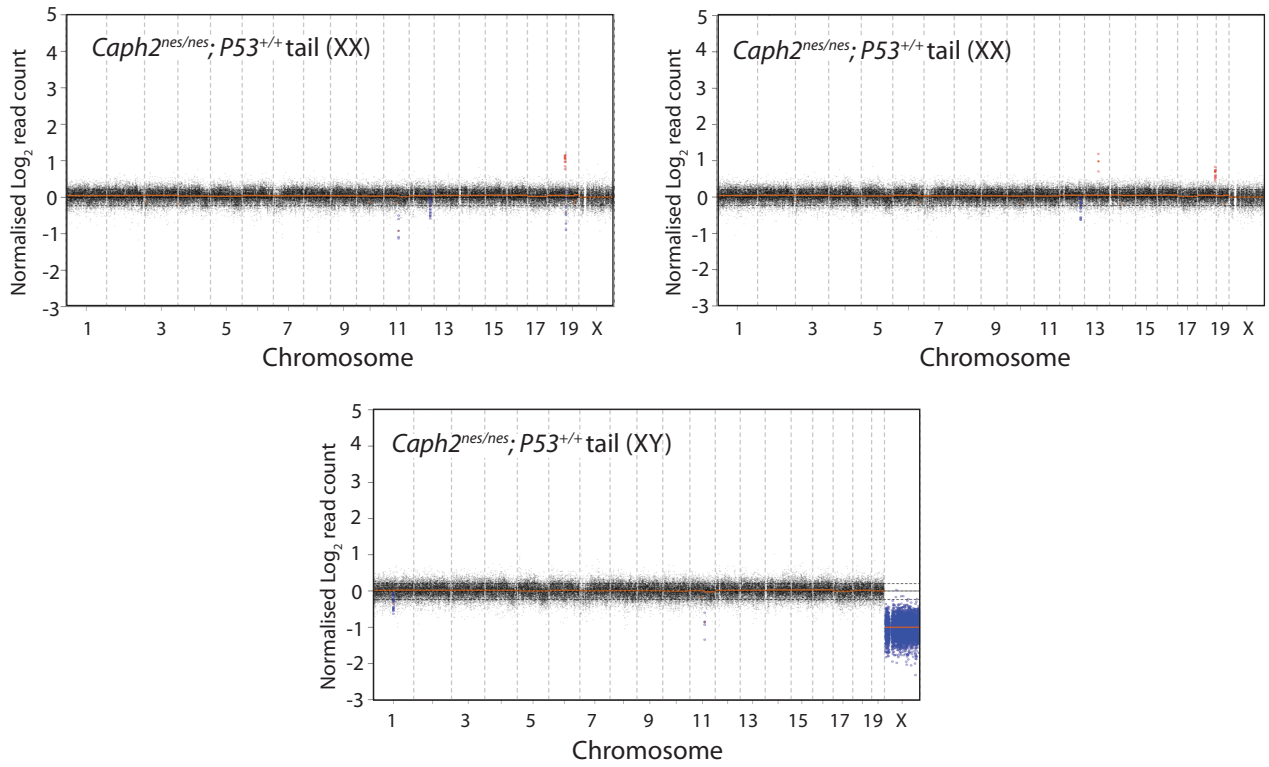

B

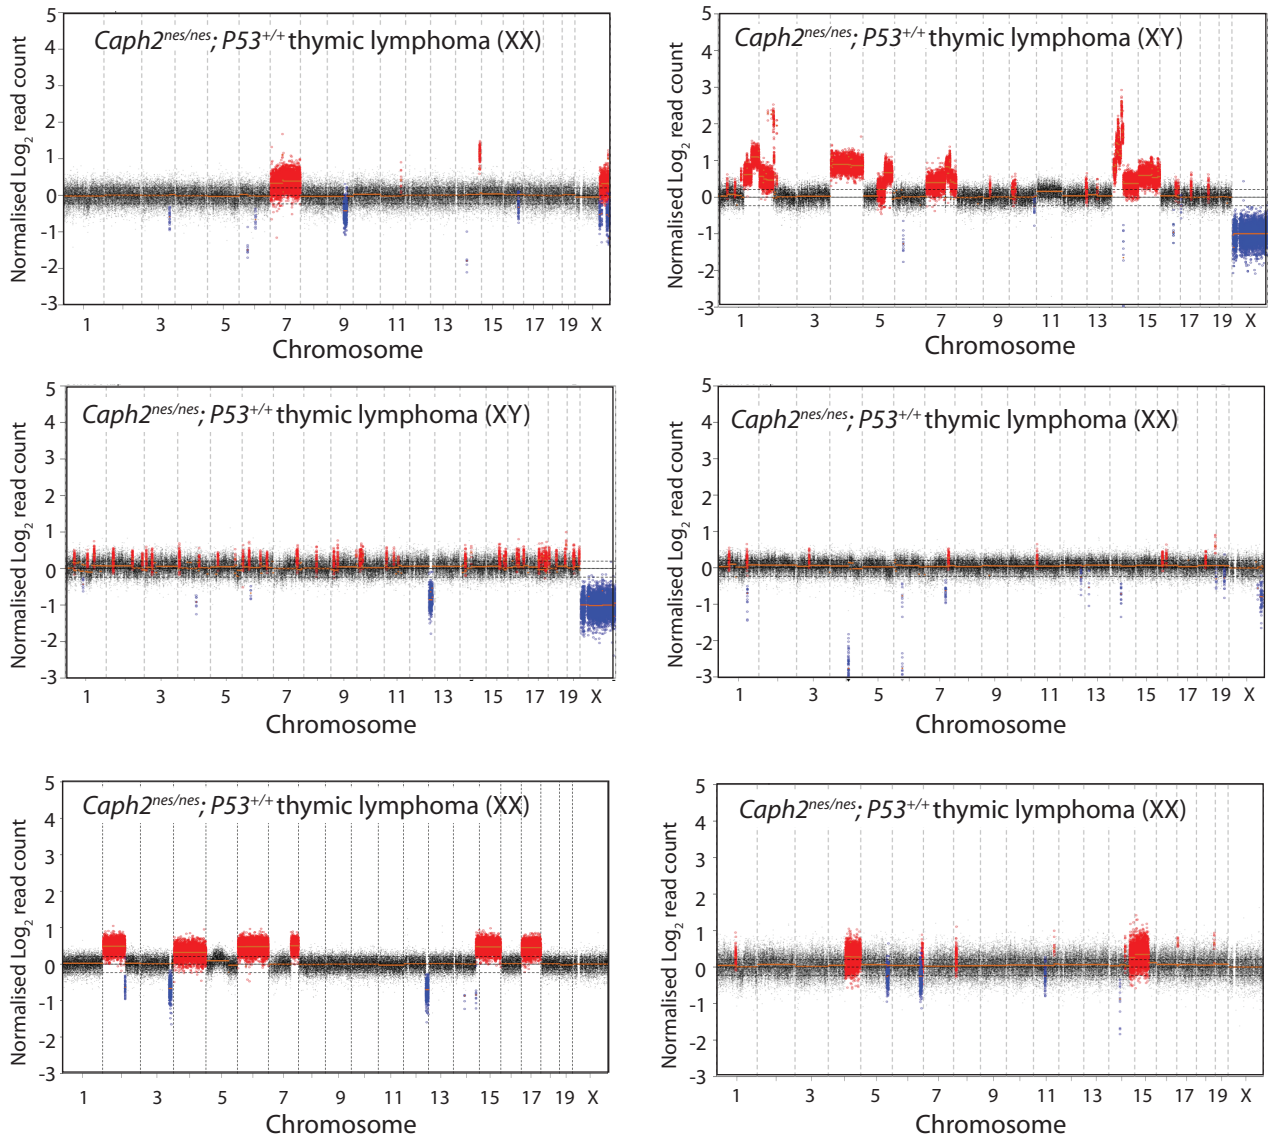





D (continued)

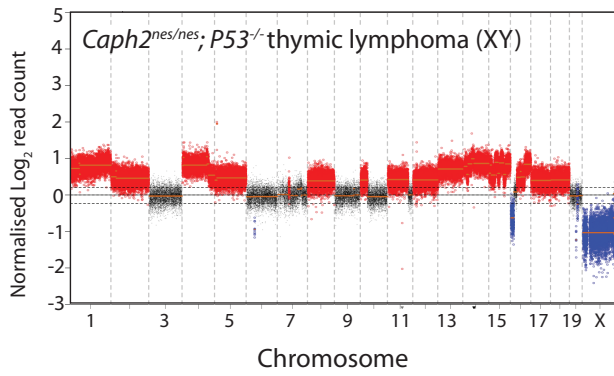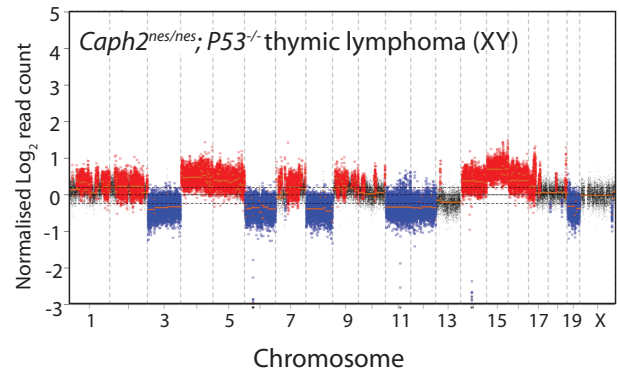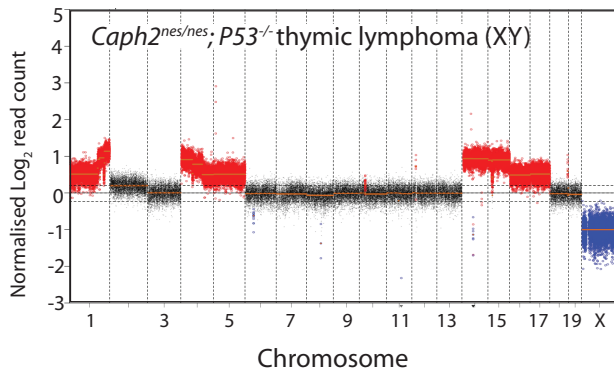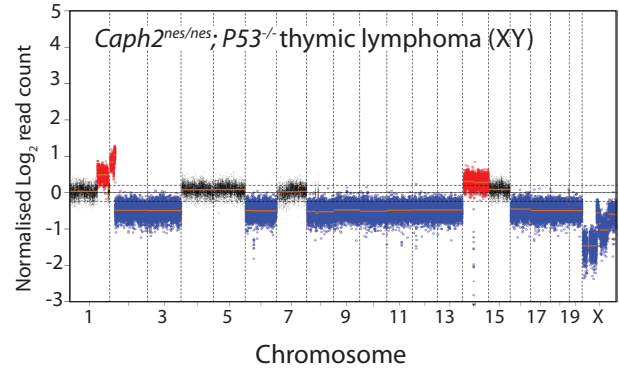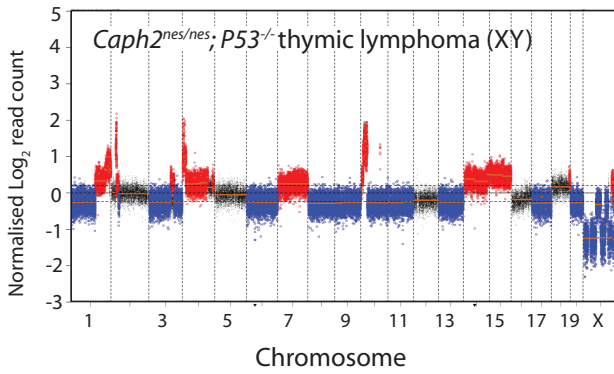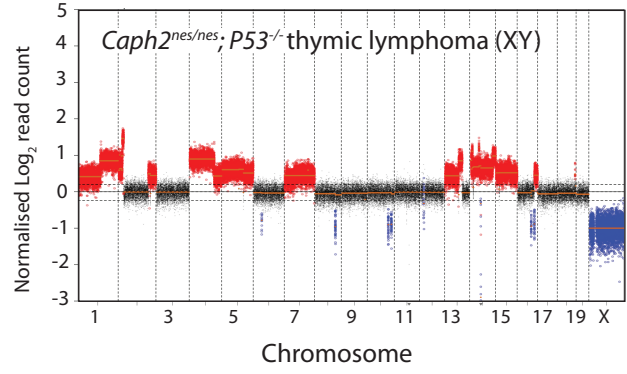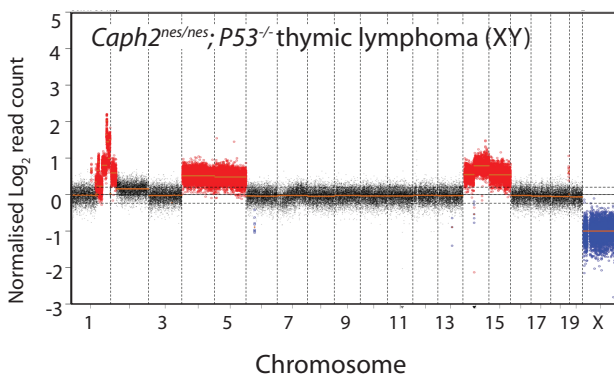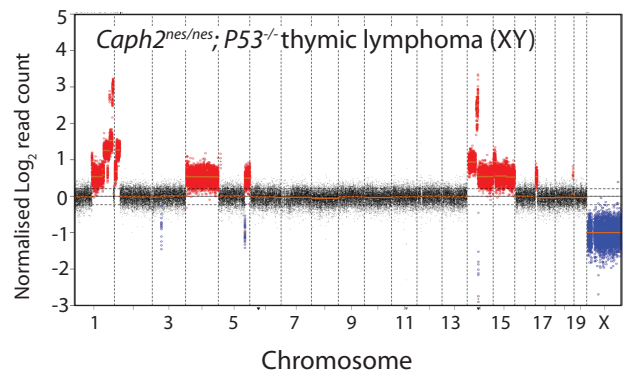

**Figure S9: Copy number profiling of tumours from *Caph2* and *P53* mutant mice.**

Copy number profiles showing read depth from shallow whole genome sequencing, presented as described in Figure 7A. **A:** DNA from aged (9 – 15 month) *Caph2*<sup>nes/nes</sup> tails. **B:** DNA from terminal (9 – 15 month) *Caph2*<sup>nes/nes</sup> thymic lymphoma tissue. **C:** DNA from terminal (~4 – 6 month) *Caph*<sup>+/+</sup> *P53*<sup>-/-</sup> thymic lymphoma tissue. **D:** DNA from terminal (2 – 3 month) *Caph2*<sup>nes/nes</sup> *P53*<sup>-/-</sup> thymic lymphoma tissue.

A

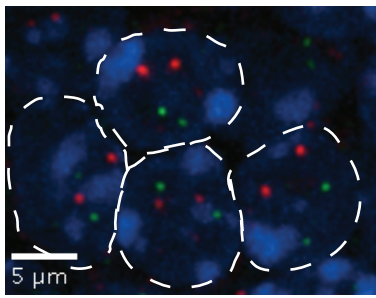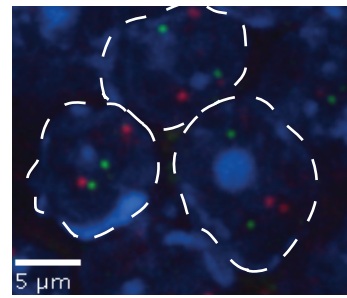

B

WI1-1265B14 (Chr6)

WI1-2585CO4 (Chr13)

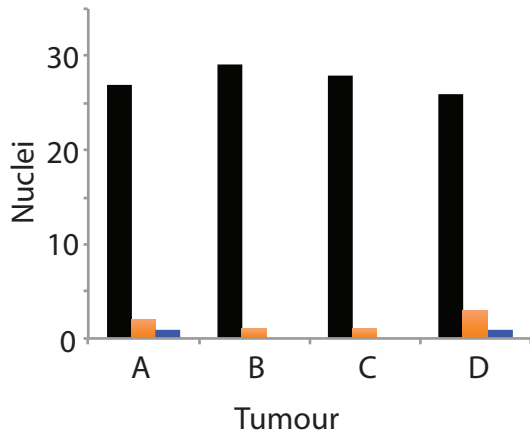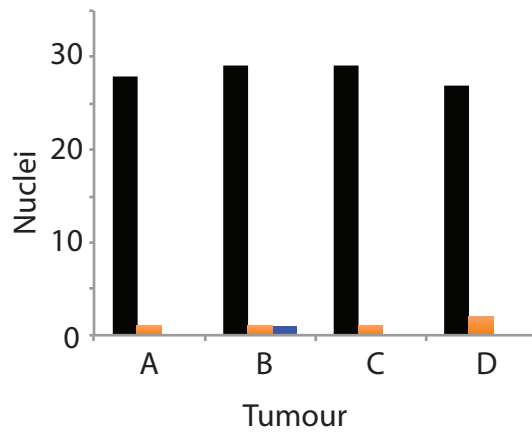

Number of foci per nucleus

■ 2

■ 3

■ 4

**Figure S10: *Caph2*<sup>nes/nes</sup> tumours are near diploid, not tetraploid**

**A.** Representative FISH images from formalin-fixed, paraffin embedded thymic lymphoma tissue sections from *Caph2*<sup>nes/nes</sup> single mutant animals ( $n = 4$ ). Fosmid probes were selected for loci on chromosome 6 (red) and chromosome 13 (green) which were known to be present at the “genome average” in all four tumours, based on shallow whole genome sequencing data. **B.** Quantification of fosmid foci per nucleus for four *Caph2*<sup>nes/nes</sup> tumour sections. 30 nuclei were counted for each tumour.

Table S1: Full list of gene ontology terms returned by the GOrilla tool for microarray transcriptome comparisons between wildtype and Caph2 mutant proliferative (CD71+) DP cells. Grey highlighting indicates terms shown in Figure S3B

| GO term                    | Description                                                                               | P-value  | FDR q-value |
|----------------------------|-------------------------------------------------------------------------------------------|----------|-------------|
| <a href="#">GO:0008152</a> | metabolic process                                                                         | 1.33E-47 | 1.65E-43    |
| <a href="#">GO:0044237</a> | cellular metabolic process                                                                | 1.84E-38 | 1.14E-34    |
| <a href="#">GO:0071704</a> | organic substance metabolic process                                                       | 2.04E-37 | 8.43E-34    |
| <a href="#">GO:0044238</a> | primary metabolic process                                                                 | 5.17E-34 | 1.60E-30    |
| <a href="#">GO:0006412</a> | translation                                                                               | 5.41E-31 | 1.34E-27    |
| <a href="#">GO:0034641</a> | cellular nitrogen compound metabolic process                                              | 1.14E-29 | 2.35E-26    |
| <a href="#">GO:0046483</a> | heterocycle metabolic process                                                             | 6.20E-28 | 1.10E-24    |
| <a href="#">GO:0034660</a> | ncRNA metabolic process                                                                   | 9.12E-28 | 1.42E-24    |
| <a href="#">GO:0006807</a> | nitrogen compound metabolic process                                                       | 3.53E-27 | 4.86E-24    |
| <a href="#">GO:0006139</a> | nucleobase-containing compound metabolic process                                          | 1.98E-26 | 2.46E-23    |
| <a href="#">GO:0006725</a> | cellular aromatic compound metabolic process                                              | 3.18E-26 | 3.59E-23    |
| <a href="#">GO:0034470</a> | ncRNA processing                                                                          | 3.27E-26 | 3.39E-23    |
| <a href="#">GO:1901360</a> | organic cyclic compound metabolic process                                                 | 4.40E-26 | 4.20E-23    |
| <a href="#">GO:0043170</a> | macromolecule metabolic process                                                           | 4.85E-25 | 4.30E-22    |
| <a href="#">GO:0006396</a> | RNA processing                                                                            | 2.67E-24 | 2.21E-21    |
| <a href="#">GO:0044260</a> | cellular macromolecule metabolic process                                                  | 8.94E-24 | 6.93E-21    |
| <a href="#">GO:0009987</a> | cellular process                                                                          | 2.03E-22 | 1.48E-19    |
| <a href="#">GO:0009058</a> | biosynthetic process                                                                      | 4.36E-21 | 3.01E-18    |
| <a href="#">GO:1901576</a> | organic substance biosynthetic process                                                    | 4.98E-21 | 3.25E-18    |
| <a href="#">GO:0044249</a> | cellular biosynthetic process                                                             | 1.21E-20 | 7.53E-18    |
| <a href="#">GO:0044085</a> | cellular component biogenesis                                                             | 1.56E-20 | 9.24E-18    |
| <a href="#">GO:0006364</a> | rRNA processing                                                                           | 3.54E-19 | 2.00E-16    |
| <a href="#">GO:0016072</a> | rRNA metabolic process                                                                    | 5.68E-19 | 3.06E-16    |
| <a href="#">GO:0090304</a> | nucleic acid metabolic process                                                            | 8.50E-19 | 4.39E-16    |
| <a href="#">GO:0022613</a> | ribonucleoprotein complex biogenesis                                                      | 1.88E-18 | 9.32E-16    |
| <a href="#">GO:0044710</a> | single-organism metabolic process                                                         | 6.55E-18 | 3.13E-15    |
| <a href="#">GO:0042254</a> | ribosome biogenesis                                                                       | 9.32E-18 | 4.28E-15    |
| <a href="#">GO:0006259</a> | DNA metabolic process                                                                     | 2.94E-17 | 1.30E-14    |
| <a href="#">GO:0006260</a> | DNA replication                                                                           | 2.99E-16 | 1.28E-13    |
| <a href="#">GO:0006399</a> | tRNA metabolic process                                                                    | 3.63E-14 | 1.50E-11    |
| <a href="#">GO:0034645</a> | cellular macromolecule biosynthetic process                                               | 5.75E-14 | 2.30E-11    |
| <a href="#">GO:0002376</a> | immune system process                                                                     | 9.26E-14 | 3.59E-11    |
| <a href="#">GO:0009059</a> | macromolecule biosynthetic process                                                        | 3.05E-13 | 1.15E-10    |
| <a href="#">GO:0019538</a> | protein metabolic process                                                                 | 9.30E-12 | 3.39E-09    |
| <a href="#">GO:0016070</a> | RNA metabolic process                                                                     | 1.84E-11 | 6.53E-09    |
| <a href="#">GO:0006955</a> | immune response                                                                           | 2.42E-11 | 8.34E-09    |
| <a href="#">GO:0044711</a> | single-organism biosynthetic process                                                      | 6.71E-11 | 2.25E-08    |
| <a href="#">GO:0002478</a> | antigen processing and presentation of exogenous peptide antigen                          | 7.45E-11 | 2.43E-08    |
| <a href="#">GO:0034341</a> | response to interferon-gamma                                                              | 8.70E-11 | 2.77E-08    |
| <a href="#">GO:0002504</a> | antigen processing and presentation of peptide or polysaccharide antigen via MHC class II | 9.66E-11 | 3.00E-08    |
| <a href="#">GO:0002495</a> | antigen processing and presentation of peptide antigen via MHC class II                   | 9.66E-11 | 2.92E-08    |

|                            |                                                                                   |          |          |
|----------------------------|-----------------------------------------------------------------------------------|----------|----------|
| <a href="#">GO:0019886</a> | antigen processing and presentation of exogenous peptide antigen via MHC class II | 9.66E-11 | 2.85E-08 |
| <a href="#">GO:0002252</a> | immune effector process                                                           | 2.00E-10 | 5.77E-08 |
| <a href="#">GO:0007005</a> | mitochondrion organization                                                        | 2.01E-10 | 5.68E-08 |
| <a href="#">GO:0006952</a> | defense response                                                                  | 2.37E-10 | 6.54E-08 |
| <a href="#">GO:1901564</a> | organonitrogen compound metabolic process                                         | 3.78E-10 | 1.02E-07 |
| <a href="#">GO:0019884</a> | antigen processing and presentation of exogenous antigen                          | 5.41E-10 | 1.43E-07 |
| <a href="#">GO:0006281</a> | DNA repair                                                                        | 9.03E-10 | 2.34E-07 |
| <a href="#">GO:0055086</a> | nucleobase-containing small molecule metabolic process                            | 9.87E-10 | 2.50E-07 |
| <a href="#">GO:0002682</a> | regulation of immune system process                                               | 1.35E-09 | 3.36E-07 |
| <a href="#">GO:0051716</a> | cellular response to stimulus                                                     | 1.39E-09 | 3.38E-07 |
| <a href="#">GO:0044267</a> | cellular protein metabolic process                                                | 1.41E-09 | 3.36E-07 |
| <a href="#">GO:0008033</a> | tRNA processing                                                                   | 1.81E-09 | 4.24E-07 |
| <a href="#">GO:0034097</a> | response to cytokine                                                              | 1.82E-09 | 4.19E-07 |
| <a href="#">GO:0006457</a> | protein folding                                                                   | 2.33E-09 | 5.27E-07 |
| <a href="#">GO:0019882</a> | antigen processing and presentation                                               | 2.62E-09 | 5.81E-07 |
| <a href="#">GO:0006974</a> | cellular response to DNA damage stimulus                                          | 2.68E-09 | 5.84E-07 |
| <a href="#">GO:0045071</a> | negative regulation of viral genome replication                                   | 3.40E-09 | 7.27E-07 |
| <a href="#">GO:0044281</a> | small molecule metabolic process                                                  | 6.21E-09 | 1.31E-06 |
| <a href="#">GO:0002684</a> | positive regulation of immune system process                                      | 6.41E-09 | 1.33E-06 |
| <a href="#">GO:0048002</a> | antigen processing and presentation of peptide antigen                            | 6.77E-09 | 1.38E-06 |
| <a href="#">GO:0006950</a> | response to stress                                                                | 7.46E-09 | 1.49E-06 |
| <a href="#">GO:0065003</a> | macromolecular complex assembly                                                   | 1.29E-08 | 2.55E-06 |
| <a href="#">GO:0043207</a> | response to external biotic stimulus                                              | 1.31E-08 | 2.55E-06 |
| <a href="#">GO:0009615</a> | response to virus                                                                 | 1.46E-08 | 2.79E-06 |
| <a href="#">GO:0006753</a> | nucleoside phosphate metabolic process                                            | 1.79E-08 | 3.36E-06 |
| <a href="#">GO:0048525</a> | negative regulation of viral process                                              | 2.18E-08 | 4.03E-06 |
| <a href="#">GO:0009607</a> | response to biotic stimulus                                                       | 2.36E-08 | 4.31E-06 |
| <a href="#">GO:1901293</a> | nucleoside phosphate biosynthetic process                                         | 4.75E-08 | 8.54E-06 |
| <a href="#">GO:0009117</a> | nucleotide metabolic process                                                      | 7.03E-08 | 1.25E-05 |
| <a href="#">GO:0055114</a> | oxidation-reduction process                                                       | 8.70E-08 | 1.52E-05 |
| <a href="#">GO:0050792</a> | regulation of viral process                                                       | 9.07E-08 | 1.56E-05 |
| <a href="#">GO:0051704</a> | multi-organism process                                                            | 9.15E-08 | 1.56E-05 |
| <a href="#">GO:0009165</a> | nucleotide biosynthetic process                                                   | 9.46E-08 | 1.59E-05 |
| <a href="#">GO:0045069</a> | regulation of viral genome replication                                            | 9.89E-08 | 1.64E-05 |
| <a href="#">GO:0090407</a> | organophosphate biosynthetic process                                              | 1.79E-07 | 2.92E-05 |
| <a href="#">GO:0043901</a> | negative regulation of multi-organism process                                     | 2.66E-07 | 4.29E-05 |
| <a href="#">GO:0043900</a> | regulation of multi-organism process                                              | 2.69E-07 | 4.28E-05 |
| <a href="#">GO:0033554</a> | cellular response to stress                                                       | 2.71E-07 | 4.25E-05 |
| <a href="#">GO:0051707</a> | response to other organism                                                        | 2.73E-07 | 4.23E-05 |
| <a href="#">GO:0009451</a> | RNA modification                                                                  | 2.74E-07 | 4.19E-05 |
| <a href="#">GO:0034622</a> | cellular macromolecular complex assembly                                          | 2.80E-07 | 4.23E-05 |
| <a href="#">GO:0051607</a> | defense response to virus                                                         | 4.10E-07 | 6.14E-05 |
| <a href="#">GO:0045087</a> | innate immune response                                                            | 5.09E-07 | 7.52E-05 |
| <a href="#">GO:0009124</a> | nucleoside monophosphate biosynthetic process                                     | 5.79E-07 | 8.46E-05 |
| <a href="#">GO:0019637</a> | organophosphate metabolic process                                                 | 6.57E-07 | 9.48E-05 |



|                            |                                                                    |          |          |
|----------------------------|--------------------------------------------------------------------|----------|----------|
| <a href="#">GO:0043903</a> | regulation of symbiosis, encompassing mutualism through parasitism | 7.94E-07 | 1.13E-04 |
| <a href="#">GO:0022900</a> | electron transport chain                                           | 9.94E-07 | 1.40E-04 |
| <a href="#">GO:0043933</a> | macromolecular complex subunit organization                        | 1.32E-06 | 1.85E-04 |
| <a href="#">GO:0035455</a> | response to interferon-alpha                                       | 1.44E-06 | 1.99E-04 |
| <a href="#">GO:0006261</a> | DNA-dependent DNA replication                                      | 1.60E-06 | 2.18E-04 |
| <a href="#">GO:0022904</a> | respiratory electron transport chain                               | 1.88E-06 | 2.54E-04 |
| <a href="#">GO:0006270</a> | DNA replication initiation                                         | 2.02E-06 | 2.70E-04 |
| <a href="#">GO:0042559</a> | pteridine-containing compound biosynthetic process                 | 2.05E-06 | 2.71E-04 |
| <a href="#">GO:0008380</a> | RNA splicing                                                       | 2.20E-06 | 2.87E-04 |
| <a href="#">GO:0050896</a> | response to stimulus                                               | 2.30E-06 | 2.97E-04 |
| <a href="#">GO:0051186</a> | cofactor metabolic process                                         | 2.38E-06 | 3.04E-04 |
| <a href="#">GO:0050776</a> | regulation of immune response                                      | 2.52E-06 | 3.19E-04 |
| <a href="#">GO:0006220</a> | pyrimidine nucleotide metabolic process                            | 2.76E-06 | 3.46E-04 |
| <a href="#">GO:0098542</a> | defense response to other organism                                 | 2.90E-06 | 3.59E-04 |
| <a href="#">GO:0000387</a> | spliceosomal snRNP assembly                                        | 3.55E-06 | 4.36E-04 |
| <a href="#">GO:0022618</a> | ribonucleoprotein complex assembly                                 | 3.59E-06 | 4.36E-04 |
| <a href="#">GO:0043038</a> | amino acid activation                                              | 5.10E-06 | 6.15E-04 |
| <a href="#">GO:0043039</a> | tRNA aminoacylation                                                | 5.10E-06 | 6.09E-04 |
| <a href="#">GO:0009605</a> | response to external stimulus                                      | 5.34E-06 | 6.31E-04 |
| <a href="#">GO:0016071</a> | mRNA metabolic process                                             | 6.36E-06 | 7.45E-04 |
| <a href="#">GO:0009156</a> | ribonucleoside monophosphate biosynthetic process                  | 6.42E-06 | 7.45E-04 |
| <a href="#">GO:0050778</a> | positive regulation of immune response                             | 7.56E-06 | 8.69E-04 |
| <a href="#">GO:0006461</a> | protein complex assembly                                           | 8.03E-06 | 9.14E-04 |
| <a href="#">GO:0035456</a> | response to interferon-beta                                        | 8.40E-06 | 9.47E-04 |

Table S2: Full list of gene ontology terms returned by the GOrilla tool for microarray transcriptome comparisons between wildtype and mutant quiescent, diploid (CD71-, FSClo) DP cells. Grey highlighting indicates terms shown in Figure S3C

| GO term                    | Description                                      | P-value  | FDR q-value |
|----------------------------|--------------------------------------------------|----------|-------------|
| <a href="#">GO:0008152</a> | metabolic process                                | 1.72E-20 | 2.13E-16    |
| <a href="#">GO:0044237</a> | cellular metabolic process                       | 8.39E-17 | 5.21E-13    |
| <a href="#">GO:0006412</a> | translation                                      | 8.55E-15 | 3.54E-11    |
| <a href="#">GO:0006259</a> | DNA metabolic process                            | 1.58E-14 | 4.90E-11    |
| <a href="#">GO:0009987</a> | cellular process                                 | 3.75E-14 | 9.30E-11    |
| <a href="#">GO:0043170</a> | macromolecule metabolic process                  | 8.82E-14 | 1.82E-10    |
| <a href="#">GO:0044238</a> | primary metabolic process                        | 1.12E-13 | 1.98E-10    |
| <a href="#">GO:0071704</a> | organic substance metabolic process              | 1.38E-13 | 2.15E-10    |
| <a href="#">GO:0044260</a> | cellular macromolecule metabolic process         | 4.20E-13 | 5.80E-10    |
| <a href="#">GO:0006974</a> | cellular response to DNA damage stimulus         | 8.68E-11 | 1.08E-07    |
| <a href="#">GO:0006260</a> | DNA replication                                  | 2.08E-10 | 2.35E-07    |
| <a href="#">GO:0019538</a> | protein metabolic process                        | 2.19E-10 | 2.26E-07    |
| <a href="#">GO:0044710</a> | single-organism metabolic process                | 2.55E-10 | 2.43E-07    |
| <a href="#">GO:0033554</a> | cellular response to stress                      | 8.54E-10 | 7.57E-07    |
| <a href="#">GO:0034641</a> | cellular nitrogen compound metabolic process     | 1.16E-09 | 9.56E-07    |
| <a href="#">GO:0006139</a> | nucleobase-containing compound metabolic process | 2.57E-09 | 2.00E-06    |
| <a href="#">GO:0006725</a> | cellular aromatic compound metabolic process     | 3.66E-09 | 2.68E-06    |
| <a href="#">GO:0046483</a> | heterocycle metabolic process                    | 5.09E-09 | 3.51E-06    |
| <a href="#">GO:0044267</a> | cellular protein metabolic process               | 6.83E-09 | 4.46E-06    |
| <a href="#">GO:0006996</a> | organelle organization                           | 7.37E-09 | 4.57E-06    |
| <a href="#">GO:0009058</a> | biosynthetic process                             | 1.01E-08 | 6.00E-06    |
| <a href="#">GO:1901360</a> | organic cyclic compound metabolic process        | 1.05E-08 | 5.90E-06    |
| <a href="#">GO:0044249</a> | cellular biosynthetic process                    | 3.12E-08 | 1.69E-05    |
| <a href="#">GO:1901576</a> | organic substance biosynthetic process           | 4.90E-08 | 2.53E-05    |
| <a href="#">GO:0006281</a> | DNA repair                                       | 5.05E-08 | 2.51E-05    |
| <a href="#">GO:0048525</a> | negative regulation of viral process             | 7.61E-08 | 3.63E-05    |
| <a href="#">GO:0006807</a> | nitrogen compound metabolic process              | 1.03E-07 | 4.74E-05    |
| <a href="#">GO:0050792</a> | regulation of viral process                      | 1.32E-07 | 5.84E-05    |
| <a href="#">GO:0006950</a> | response to stress                               | 1.62E-07 | 6.92E-05    |
| <a href="#">GO:1902589</a> | single-organism organelle organization           | 1.72E-07 | 7.13E-05    |
| <a href="#">GO:0045069</a> | regulation of viral genome replication           | 3.16E-07 | 1.26E-04    |
| <a href="#">GO:0045071</a> | negative regulation of viral genome replication  | 3.49E-07 | 1.36E-04    |
| <a href="#">GO:0034110</a> | regulation of homotypic cell-cell adhesion       | 3.76E-07 | 1.41E-04    |
| <a href="#">GO:0019884</a> | antigen processing and presentation of exogenous | 3.90E-07 | 1.42E-04    |
| <a href="#">GO:1903037</a> | regulation of leukocyte cell-cell adhesion       | 4.00E-07 | 1.42E-04    |
| <a href="#">GO:0022402</a> | cell cycle process                               | 4.53E-07 | 1.56E-04    |
| <a href="#">GO:0007067</a> | mitotic nuclear division                         | 5.39E-07 | 1.81E-04    |
| <a href="#">GO:0002376</a> | immune system process                            | 6.03E-07 | 1.97E-04    |
| <a href="#">GO:0050863</a> | regulation of T cell activation                  | 7.35E-07 | 2.34E-04    |
| <a href="#">GO:0034341</a> | response to interferon-gamma                     | 7.49E-07 | 2.32E-04    |
| <a href="#">GO:0009124</a> | nucleoside monophosphate biosynthetic process    | 8.06E-07 | 2.44E-04    |
| <a href="#">GO:0007049</a> | cell cycle                                       | 8.28E-07 | 2.45E-04    |
| <a href="#">GO:0034645</a> | cellular macromolecule biosynthetic process      | 8.85E-07 | 2.55E-04    |
| <a href="#">GO:0051301</a> | cell division                                    | 9.29E-07 | 2.62E-04    |
| <a href="#">GO:1903047</a> | mitotic cell cycle process                       | 9.77E-07 | 2.69E-04    |
| <a href="#">GO:0043901</a> | negative regulation of multi-organism process    | 1.05E-06 | 2.83E-04    |
| <a href="#">GO:0006461</a> | protein complex assembly                         | 1.11E-06 | 2.92E-04    |
| <a href="#">GO:0002428</a> | antigen processing and presentation of peptide   | 1.25E-06 | 3.24E-04    |

|                            |                                                        |          |          |
|----------------------------|--------------------------------------------------------|----------|----------|
| <a href="#">GO:0009059</a> | macromolecule biosynthetic process                     | 1.36E-06 | 3.46E-04 |
| <a href="#">GO:0065003</a> | macromolecular complex assembly                        | 1.37E-06 | 3.41E-04 |
| <a href="#">GO:0019882</a> | antigen processing and presentation                    | 1.47E-06 | 3.57E-04 |
| <a href="#">GO:0009123</a> | nucleoside monophosphate metabolic process             | 1.48E-06 | 3.54E-04 |
| <a href="#">GO:0090304</a> | nucleic acid metabolic process                         | 1.66E-06 | 3.88E-04 |
| <a href="#">GO:0055114</a> | oxidation-reduction process                            | 1.71E-06 | 3.92E-04 |
| <a href="#">GO:0006753</a> | nucleoside phosphate metabolic process                 | 1.83E-06 | 4.14E-04 |
| <a href="#">GO:0043903</a> | regulation of symbiosis, encompassing mutualism        | 1.86E-06 | 4.13E-04 |
| <a href="#">GO:0048285</a> | organelle fission                                      | 2.27E-06 | 4.93E-04 |
| <a href="#">GO:0034655</a> | nucleobase-containing compound catabolic process       | 2.39E-06 | 5.12E-04 |
| <a href="#">GO:0055086</a> | nucleobase-containing small molecule metabolic process | 2.42E-06 | 5.10E-04 |
| <a href="#">GO:0048002</a> | antigen processing and presentation of peptide         | 2.59E-06 | 5.37E-04 |
| <a href="#">GO:0045184</a> | establishment of protein localization                  | 2.72E-06 | 5.53E-04 |
| <a href="#">GO:0009117</a> | nucleotide metabolic process                           | 3.64E-06 | 7.30E-04 |
| <a href="#">GO:0051179</a> | localization                                           | 3.88E-06 | 7.65E-04 |
| <a href="#">GO:0043900</a> | regulation of multi-organism process                   | 3.89E-06 | 7.54E-04 |
| <a href="#">GO:0044085</a> | cellular component biogenesis                          | 4.18E-06 | 7.97E-04 |
| <a href="#">GO:0002478</a> | antigen processing and presentation of exogenous       | 4.34E-06 | 8.17E-04 |
| <a href="#">GO:0043623</a> | cellular protein complex assembly                      | 4.52E-06 | 8.37E-04 |
| <a href="#">GO:0022900</a> | electron transport chain                               | 5.56E-06 | 9.99E-04 |
| <a href="#">GO:0034622</a> | cellular macromolecular complex assembly               | 5.56E-06 | 9.86E-04 |

Table S3: Log2 fold change values for known P53 pathway genes, determined by RT-qPCR. Data are presented as fold change relative to wildtype for Caph2 single mutants (Nes) and P53 Caph2 double homozygous mutants (DHM). Experiments were performed in total CD71- (quiescent) DP cells, and are derived from two independent experiments, each with two technical replicates. Functional annotations are based on SABiosciences product literature: "A" = apoptosis, "C" = cell cycle arrest, "N/A" = other

| Symbol    | Function | Fold Regulation Nes vs WT CD71+ | Fold Regulation DHM vs WT CD71+ | Fold Regulation in Nes vs WT CD71- | Fold Regulation in DHM vs WT CD71- |
|-----------|----------|---------------------------------|---------------------------------|------------------------------------|------------------------------------|
| Bbc3      | A        | 1.9                             | -2.1332                         | 1.7029                             | -1.2852                            |
| Apaf1     | A        | -1.1479                         | -2.2008                         | 1.2684                             | -1.4917                            |
| Bag1      | A        | 1.0762                          | 1.426                           | 1.1274                             | 1.6335                             |
| Bax       | A        | 1.5168                          | -1.3361                         | 1.3454                             | -1.3918                            |
| Bcl2      | A        | -1.5411                         | -3.8317                         | -1.456                             | -2.6153                            |
| Bid       | A        | -1.1559                         | -1.5032                         | -1.0224                            | 1.5084                             |
| Birc5     | A        | -1.1843                         | -1.8764                         | 1.5241                             | -1.2117                            |
| Bnip3     | A        | -2.2486                         | -2.2784                         | -1.4409                            | 1.1392                             |
| Btg2      | A        | -1.3938                         | -1.8125                         | 1.1712                             | 1.041                              |
| Casp2     | A        | -1.2959                         | -1.498                          | -1.0622                            | 1.0056                             |
| Casp9     | A        | -1.9507                         | -1.2294                         | -1.1463                            | -1.0295                            |
| Cradd     | A        | -1.3095                         | -3.2784                         | 1.1591                             | -1.3168                            |
| Dapk1     | A        | -1.7219                         | -1.3315                         | -1.0733                            | -1.0733                            |
| Fadd      | A        | -1.1559                         | -1.5347                         | -1.1867                            | -1.115                             |
| Fas       | A        | -1.5465                         | -2.2784                         | -1.2457                            | -1.3918                            |
| Fasl      | A        | 9.6532                          | -4.0925                         | 3.0589                             | -1.2763                            |
| Foxo3     | A        | -1.3841                         | -1.4469                         | -1.1583                            | -1.0189                            |
| Mcl1      | A        | -1.5955                         | -1.6506                         | -1.0295                            | 1.0446                             |
| Myc       | A        | 1.5867                          | 3.1976                          | -1.5178                            | 1.567                              |
| Nf1       | A        | -1.4231                         | -1.6563                         | 1.238                              | 1.2906                             |
| Nfkb1     | A        | -1.5735                         | -1.6563                         | -1.3077                            | -1.5933                            |
| Noxa      | A        | 2.7435                          | -9.6331                         | 5.4566                             | -1.0996                            |
| Prkca     | A        | -1.5305                         | -1.3784                         | -1.2719                            | -1.5551                            |
| Sirt1     | A        | -1.168                          | -1.5889                         | -1.0882                            | -1.092                             |
| Tnf       | A        | -1.5735                         | 1.2243                          | -1.0845                            | -1.5988                            |
| Tnfrsf10b | A        | -1.0454                         | 1.3213                          | -1.2286                            | 1.0091                             |
| Traf1     | A        | -3.1689                         | -4.2516                         | -1.6044                            | -3.0568                            |
| Zmat3     | A        | 1.4959                          | -5.4377                         | 1.295                              | -2.0028                            |
| Atm       | A + C    | 1.3296                          | 1.2286                          | 1.0196                             | 1.0777                             |
| E2f1      | A + C    | 1.4651                          | -1.1672                         | 2.1038                             | 2.3343                             |
| Pten      | A + C    | -1.629                          | -1.87                           | -1.3918                            | -1.1704                            |
| Trp53     | A + C    | -1.1559                         | -3.0589                         | -1.3679                            | -3.078                             |
| Trp53bp2  | A + C    | -1.669                          | -1.5779                         | -1.1266                            | -1.1266                            |
| Brca1     | C        | -1.2518                         | -2.1856                         | 1.4876                             | -1.1623                            |
| Brca2     | C        | -1.4479                         | -3.3242                         | 1.6563                             | -1.2117                            |
| Ccnb1     | C        | -1.0747                         | -1.3832                         | 1.8188                             | -1.1384                            |
| Ccne1     | C        | -1.086                          | -1.7752                         | 1.0966                             | -1.69                              |
| Ccng1     | C        | 1.325                           | -2.5019                         | 1.2252                             | -1.6495                            |
| Ccnh      | C        | -1.0133                         | -1.2209                         | -1.3775                            | -1.1463                            |
| Cdc25a    | C        | -1.1127                         | -1.3361                         | 1.264                              | 1.295                              |

|         |      |          |          |         |         |
|---------|------|----------|----------|---------|---------|
| Cdc25c  | C    | -1.3794  | -1.9697  | 1.5189  | -1.2201 |
| Cdk1    | C    | -1.1843  | -1.4621  | 2.0181  | -1.1663 |
| Cdk4    | C    | 1.0007   | -1.2995  | 1.0126  | 1.2423  |
| Cdkn1a  | C    | 3.9477   | -1.7508  | 8.6219  | 1.7938  |
| Chek1   | C    | 1.4907   | 1.1188   | 2.4674  | 1.1235  |
| Chek2   | C    | -1.2008  | -2.2784  | -1.0119 | 1.0091  |
| Cul9    | C    | 2.8699   | 2.6889   | 1.3223  | 4.7999  |
| E2f3    | C    | -1.0526  | -1.1917  | -1.0224 | 1.089   |
| Esr1    | C    | -1.7159  | -11.0655 | -1.8366 | -4.1325 |
| Gadd45a | C    | -1.579   | -1.4825  | 1.0483  | 1.0852  |
| Jun     | C    | 1.5379   | -2.7473  | 3.4653  | 3.0908  |
| Kras    | C    | -1.6234  | -2.1111  | -1.1345 | -1.077  |
| Mdm2    | C    | -1.2092  | -1.697   | -1.1384 | 1.0303  |
| Mlh1    | C    | -1.0747  | -1.7267  | -1.4712 | -1.3168 |
| Msh2    | C    | 1.6426   | -1.0231  | 1.1119  | 1.2684  |
| Pcna    | C    | -1.0973  | -1.4074  | 1.4419  | 1.1712  |
| Ppm1d   | C    | -1.3095  | -1.8895  | 1.0056  | 1.0338  |
| Prc1    | C    | -1.4429  | -2.0605  | 1.4025  | -1.0958 |
| Pttg1   | C    | 1.455    | -1.0056  | -1.0512 | -1.2243 |
| Rb1     | C    | -1.6923  | -2.2784  | -1.2201 | -1.2501 |
| Sesn2   | C    | -1.1479  | 1.2159   | 2.0605  | 1.9225  |
| Sfn     | C    | -1.6066  | -1.1958  | -1.1704 | 1.1274  |
| Apex1   | #N/A | -19.2796 | 1.7496   | -1.2852 | 1.2294  |
| Atr     | #N/A | -1.0898  | -1.1471  | -1.3491 | 1.0374  |
| Dnmt1   | #N/A | -1.0274  | -1.7938  | 1.2     | -1.195  |
| Egr1    | #N/A | -2.4606  | -2.3751  | -1.6725 | -1.7315 |
| Ep300   | #N/A | -1.5094  | -1.0483  | -1.2986 | 1.0592  |
| Erc1    | #N/A | -1.3095  | -1.457   | -1.1463 | -1.2763 |
| Hif1a   | #N/A | -1.601   | -1.8895  | -1.1345 | -1.1111 |
| Lig4    | #N/A | -1.2825  | -1.5834  | 1.0483  | 1.0852  |
| Mdm4    | #N/A | -1.7826  | -2.0605  | -1.4064 | -1.3122 |
| Rela    | #N/A | -1.1639  | -1.388   | -1.0189 | 1.0126  |
| Stat1   | #N/A | -1.0822  | -1.7569  | 1.2995  | -1.2201 |
| Xrcc4   | #N/A | -1.8013  | -1.9561  | -1.426  | -1.6552 |
| Xrcc5   | #N/A | -1.205   | -1.6449  | -1.5551 | -1.5497 |

**Table S4: The top 10 deleted regions in terminal Caph2 single mutant tumour genomes, ranked by normalised Log2 read count. Genes with characterised roles in oncogenesis are highlighted in red**

| Tumour ID    | Chr | bpstart     | bpend       | Normalised Log2 read count | Genes within deletion                                                                     |
|--------------|-----|-------------|-------------|----------------------------|-------------------------------------------------------------------------------------------|
| <b>CNA3</b>  | 19  | 31,980,001  | 33,330,000  | -2.808848769               | <b>Pten</b>                                                                               |
| <b>CNA11</b> | 4   | 89,280,001  | 91,020,000  | -2.72312506                | <b>CDKN2A</b>                                                                             |
| <b>CNA2</b>  | 10  | 64,290,001  | 66,960,000  | -1.326395714               | Ctnna3                                                                                    |
| <b>CNA2</b>  | 4   | 88,950,001  | 93,390,000  | -1.249318996               | <b>CDKN2A, CDKN2B</b>                                                                     |
| <b>CNA9</b>  | 16  | 64,830,001  | 65,370,000  | -0.959156134               | htr1f, Cggbp1                                                                             |
| <b>CNA8</b>  | 4   | 89,040,001  | 89,280,000  | -0.917241212               | <b>CDKN2A, CDKN2B</b>                                                                     |
| <b>CNA8</b>  | 12  | 93,270,001  | 99,210,000  | -0.860903904               | Many                                                                                      |
| <b>CNA8</b>  | 12  | 101,070,001 | 106,800,000 | -0.860445412               | Many                                                                                      |
| <b>CNA2</b>  | 4   | 121,260,001 | 122,820,000 | -0.839961576               | Many                                                                                      |
| <b>CNA8</b>  | 12  | 108,000,001 | 108,810,000 | -0.788263764               | <b>Bcl11b</b> , Setd3, Ccnk, Ccdc85c, Hhip1, <b>Eml1</b> , <b>Evl</b> , Degs2, <b>Yy1</b> |

**Table S5: Cell surface markers used for immunophenotyping in this study**

| <b>Cell Subset</b>                | <b>Immunophenotype</b>                                                            |
|-----------------------------------|-----------------------------------------------------------------------------------|
| <b>Stem Cells and Progenitors</b> |                                                                                   |
| LSK                               | (CD4-, CD5-, CD8-, CD11b-, Gr1-, B220-, Ter119-) Sca-1+, c-Kit+                   |
| Myeloid progenitors (LK)          | (CD4-, CD5-, CD8-, CD11b-, Gr1-, B220-, Ter119-) Sca-1+, c-Kit-                   |
| Common Lymphoid progenitors (CLP) | (CD4-, CD5-, CD8-, CD11b-, Gr1-, B220-, Ter119-) Flt-3+, CD127+, c-Kitlo, Sca-1lo |
| <b>Thymic T lymphocytes</b>       |                                                                                   |
| DN1                               | CD90+, CD4-, CD8-, CD44hi, CD25-                                                  |
| DN2                               | CD90+, CD4-, CD8-, CD44hi, CD25+                                                  |
| DN3                               | CD90+, CD4-, CD8-, CD44lo, CD25+                                                  |
| DN4                               | CD90+, CD4-, CD8-, CD44lo, CD25-, TCR $\gamma\delta$ -                            |
| DP CD71+                          | CD4+, CD8+, CD71+                                                                 |
| DP CD71-                          | CD4+, CD8+, CD71-                                                                 |
| CD4SP                             | CD4+, CD8-                                                                        |
| <b>Bone Marrow B lymphocytes</b>  |                                                                                   |
| Fraction A                        | B220+, CD43+, CD24-, BP1-                                                         |
| Fraction B                        | B220+, CD43+, CD24+, BP1-                                                         |
| Fraction C                        | B220+, CD43+, CD24+, BP1+                                                         |
| Fraction D                        | B220+, CD43-, IgM-                                                                |
| Fraction E                        | B220+, CD43-, IgM+                                                                |
| Fraction F                        | B220++, CD43-, IgM+                                                               |

**Table S6: Antibody details**

| <b>Antibody</b> | <b>Application</b> | <b>Dilution</b> | <b>Clone ID or Cat #</b> | <b>Supplier</b> |
|-----------------|--------------------|-----------------|--------------------------|-----------------|
| B220            | FACS               | 1/200           | RA3-6B2                  | eBioScience     |
| BP-1            | FACS               | 1/50            | 6C3                      | eBioScience     |
| BrdU            | FACS               | 1/50            | with kit #557892         | BD Pharmingen   |
| CD4             | FACS               | 1/400           | RM4-5                    | eBioScience     |
| CD8             | FACS               | 1/1000          | 53-6.7                   | eBioScience     |
| CD24            | FACS               | 1/500           | 30F1                     | eBioScience     |
| CD25            | FACS               | 1/100           | PC61.5                   | eBioScience     |
| CD43            | FACS               | 1/200           | eBio R2/60               | eBioScience     |
| CD44            | FACS               | 1/100           | IM7                      | eBioScience     |
| CD71            | FACS               | 1/100           | RI7217                   | Biolegend       |
| CD90            | FACS               | 1/500           | 53.2.1                   | eBioScience     |
| CD127           | FACS               | 1/200           | 135023                   | Biolegend       |
| c-kit           | FACS               | 1/200           | 105826                   | Biolegend       |
| Flt-3           | FACS               | 1/100           | 135310                   | Biolegend       |
| IgM             | FACS               | 1/200           | II/41                    | eBioScience     |
| Sca-1           | FACS               | 1/200           | 122506                   | Biolegend       |
| alpha Tubulin   | Western/IF         | 1/250           | YOL1/34                  | BioRad          |
| H3S10P          | IF                 | 1/500           | 6G3                      | CST             |

**BM Lineage cocktail 10X:**

|              |      |        |        |           |
|--------------|------|--------|--------|-----------|
| <u>CD3</u>   | FACS | 1/100  | 559971 | BD        |
| CD4          | FACS | 1/1600 | 553649 | BD        |
| CD5          | FACS | 1/800  | 553019 | BD        |
| CD8a         | FACS | 1/800  | 553029 | BD        |
| Mac-1/CD11b  | FACS | 1/200  | 553309 | BD        |
| B220         | FACS | 1/200  | 553086 | BD        |
| Ter119       | FACS | 1/50   | 553672 | BD        |
| Gr-1         | FACS | 1/100  | 553125 | BD        |
| Streptavidin | FACS | 1/200  | 405229 | Biolegend |



**Table S7: FISH probe details**

| <b>Probe ID</b>         | <b>Probe Type</b> | <b>Experiment</b>                    | <b>Chr</b> | <b>Coordinates (GRCm38)</b> |
|-------------------------|-------------------|--------------------------------------|------------|-----------------------------|
| <b>Chr2 point probe</b> | Sequence capture  | Tetraploidy (Figure 6D & E)          | 2          | 74,636,100-74,767,381       |
| <b>Chr2 paint</b>       | Sequence Capture  | Tetraploidy (Figure 6D & E)          | 2          | Whole exome of Mmu 2        |
| <b>WI1-2585C04</b>      | Fosmid            | Tumour ploidy (Figure S10)           | 13         | 51,917,709 - 51,959,777     |
| <b>WI1 - 1265B14</b>    | Fosmid            | Tumour ploidy (Figure S10)           | 6          | 30,756,571 - 30,789,822     |
| <b>WI1-1141E16</b>      | Fosmid            | CD8 locus compaction (Figure S2)     | 6          | 71,395,924 - 71,439,942     |
| <b>WI1-1250E20</b>      | Fosmid            | CD8 locus compaction (Figure S2)     | 6          | 71,24,174 - 71,271,897      |
| <b>G135P68104F</b>      | Fosmid            | CD8 to Igkv compaction (Figure S2)   | 6          | 70,041,587 - 70,083,551     |
| <b>G135P600867C1</b>    | Fosmid            | CD8 to Mad2L1 compaction (Figure S2) | 6          | 66,449,639 - 66,484,514     |

Table S8: Full list of gene ontology terms returned by the GOrilla tool for microarray transcriptome comparisons between non-cycling diploid (CD71-, FSClo) and non-cycling tetraploid (CD71-FSChi) DP cells purified from Caph2 mutant thymus. Grey highlighting indicates terms shown in Figure S3D

| GO term                    | Description                                      | P-value  | FDR q-value |
|----------------------------|--------------------------------------------------|----------|-------------|
| <a href="#">GO:0044260</a> | cellular macromolecule metabolic process         | 2.78E-53 | 3.91E-49    |
| <a href="#">GO:0009987</a> | cellular process                                 | 2.54E-52 | 1.78E-48    |
| <a href="#">GO:0044237</a> | cellular metabolic process                       | 7.45E-50 | 3.49E-46    |
| <a href="#">GO:0034641</a> | cellular nitrogen compound metabolic process     | 1.03E-45 | 3.63E-42    |
| <a href="#">GO:0046483</a> | heterocycle metabolic process                    | 2.06E-44 | 5.79E-41    |
| <a href="#">GO:0006139</a> | nucleobase-containing compound metabolic process | 2.71E-44 | 6.34E-41    |
| <a href="#">GO:0043170</a> | macromolecule metabolic process                  | 3.52E-44 | 7.06E-41    |
| <a href="#">GO:0006725</a> | cellular aromatic compound metabolic process     | 4.60E-43 | 8.09E-40    |
| <a href="#">GO:0006807</a> | nitrogen compound metabolic process              | 2.85E-41 | 4.45E-38    |
| <a href="#">GO:0044238</a> | primary metabolic process                        | 2.91E-41 | 4.09E-38    |
| <a href="#">GO:0071704</a> | organic substance metabolic process              | 2.17E-39 | 2.77E-36    |
| <a href="#">GO:0090304</a> | nucleic acid metabolic process                   | 2.46E-39 | 2.88E-36    |
| <a href="#">GO:0008152</a> | metabolic process                                | 5.15E-39 | 5.56E-36    |
| <a href="#">GO:1901360</a> | organic cyclic compound metabolic process        | 6.14E-39 | 6.16E-36    |
| <a href="#">GO:0071840</a> | cellular component organization or biogenesis    | 2.20E-35 | 2.06E-32    |
| <a href="#">GO:0016043</a> | cellular component organization                  | 3.39E-34 | 2.97E-31    |
| <a href="#">GO:0022402</a> | cell cycle process                               | 4.00E-34 | 3.31E-31    |
| <a href="#">GO:1903047</a> | mitotic cell cycle process                       | 2.05E-32 | 1.60E-29    |
| <a href="#">GO:0007049</a> | cell cycle                                       | 1.57E-31 | 1.16E-28    |
| <a href="#">GO:0043933</a> | macromolecular complex subunit organization      | 3.92E-31 | 2.76E-28    |
| <a href="#">GO:0006259</a> | DNA metabolic process                            | 8.48E-31 | 5.68E-28    |
| <a href="#">GO:0007067</a> | mitotic nuclear division                         | 1.12E-27 | 7.16E-25    |
| <a href="#">GO:0000280</a> | nuclear division                                 | 3.85E-26 | 2.35E-23    |
| <a href="#">GO:0006325</a> | chromatin organization                           | 5.40E-26 | 3.16E-23    |
| <a href="#">GO:0048285</a> | organelle fission                                | 3.20E-24 | 1.80E-21    |
| <a href="#">GO:0006396</a> | RNA processing                                   | 9.36E-24 | 5.06E-21    |
| <a href="#">GO:0051276</a> | chromosome organization                          | 2.26E-23 | 1.18E-20    |
| <a href="#">GO:0051301</a> | cell division                                    | 2.34E-23 | 1.17E-20    |
| <a href="#">GO:0006260</a> | DNA replication                                  | 2.83E-23 | 1.37E-20    |
| <a href="#">GO:0006974</a> | cellular response to DNA damage stimulus         | 1.06E-21 | 4.97E-19    |
| <a href="#">GO:0006996</a> | organelle organization                           | 1.08E-20 | 4.89E-18    |
| <a href="#">GO:0016071</a> | mRNA metabolic process                           | 4.48E-20 | 1.97E-17    |
| <a href="#">GO:0006281</a> | DNA repair                                       | 5.45E-20 | 2.32E-17    |
| <a href="#">GO:0034622</a> | cellular macromolecular complex assembly         | 9.47E-20 | 3.91E-17    |
| <a href="#">GO:0033554</a> | cellular response to stress                      | 4.48E-19 | 1.80E-16    |
| <a href="#">GO:0065003</a> | macromolecular complex assembly                  | 4.59E-19 | 1.79E-16    |
| <a href="#">GO:0016070</a> | RNA metabolic process                            | 1.76E-18 | 6.70E-16    |
| <a href="#">GO:0044249</a> | cellular biosynthetic process                    | 3.16E-18 | 1.17E-15    |
| <a href="#">GO:0022607</a> | cellular component assembly                      | 4.84E-18 | 1.74E-15    |
| <a href="#">GO:0007059</a> | chromosome segregation                           | 1.56E-17 | 5.47E-15    |
| <a href="#">GO:0044267</a> | cellular protein metabolic process               | 2.59E-17 | 8.88E-15    |

|                            |                                                                |          |          |
|----------------------------|----------------------------------------------------------------|----------|----------|
| <a href="#">GO:0006397</a> | mRNA processing                                                | 3.58E-17 | 1.20E-14 |
| <a href="#">GO:1901576</a> | organic substance biosynthetic process                         | 5.06E-17 | 1.65E-14 |
| <a href="#">GO:0009058</a> | biosynthetic process                                           | 1.30E-16 | 4.14E-14 |
| <a href="#">GO:0043412</a> | macromolecule modification                                     | 2.58E-15 | 8.06E-13 |
| <a href="#">GO:0033044</a> | regulation of chromosome organization                          | 2.84E-15 | 8.67E-13 |
| <a href="#">GO:0071824</a> | protein-DNA complex subunit organization                       | 6.99E-15 | 2.09E-12 |
| <a href="#">GO:0051171</a> | regulation of nitrogen compound metabolic process              | 1.83E-14 | 5.36E-12 |
| <a href="#">GO:0051052</a> | regulation of DNA metabolic process                            | 2.58E-14 | 7.39E-12 |
| <a href="#">GO:0006334</a> | nucleosome assembly                                            | 3.20E-14 | 8.99E-12 |
| <a href="#">GO:0034728</a> | nucleosome organization                                        | 3.31E-14 | 9.12E-12 |
| <a href="#">GO:0006333</a> | chromatin assembly or disassembly                              | 3.50E-14 | 9.45E-12 |
| <a href="#">GO:0022618</a> | ribonucleoprotein complex assembly                             | 4.23E-14 | 1.12E-11 |
| <a href="#">GO:0051726</a> | regulation of cell cycle                                       | 4.56E-14 | 1.19E-11 |
| <a href="#">GO:0010564</a> | regulation of cell cycle process                               | 6.03E-14 | 1.54E-11 |
| <a href="#">GO:0065004</a> | protein-DNA complex assembly                                   | 6.19E-14 | 1.55E-11 |
| <a href="#">GO:0071826</a> | ribonucleoprotein complex subunit organization                 | 6.91E-14 | 1.70E-11 |
| <a href="#">GO:0019538</a> | protein metabolic process                                      | 7.93E-14 | 1.92E-11 |
| <a href="#">GO:0007346</a> | regulation of mitotic cell cycle                               | 8.47E-14 | 2.02E-11 |
| <a href="#">GO:0019222</a> | regulation of metabolic process                                | 1.04E-13 | 2.43E-11 |
| <a href="#">GO:0034645</a> | cellular macromolecule biosynthetic process                    | 1.56E-13 | 3.59E-11 |
| <a href="#">GO:0008380</a> | RNA splicing                                                   | 1.64E-13 | 3.71E-11 |
| <a href="#">GO:0044271</a> | cellular nitrogen compound biosynthetic process                | 1.82E-13 | 4.07E-11 |
| <a href="#">GO:0006464</a> | cellular protein modification process                          | 1.88E-13 | 4.13E-11 |
| <a href="#">GO:0036211</a> | protein modification process                                   | 1.88E-13 | 4.07E-11 |
| <a href="#">GO:0033043</a> | regulation of organelle organization                           | 2.51E-13 | 5.34E-11 |
| <a href="#">GO:0060255</a> | regulation of macromolecule metabolic process                  | 2.82E-13 | 5.92E-11 |
| <a href="#">GO:0080090</a> | regulation of primary metabolic process                        | 3.88E-13 | 8.02E-11 |
| <a href="#">GO:0019219</a> | regulation of nucleobase-containing compound metabolic process | 4.11E-13 | 8.37E-11 |
| <a href="#">GO:2001252</a> | positive regulation of chromosome organization                 | 4.33E-13 | 8.70E-11 |
| <a href="#">GO:0010556</a> | regulation of macromolecule biosynthetic process               | 4.49E-13 | 8.88E-11 |
| <a href="#">GO:0051716</a> | cellular response to stimulus                                  | 5.98E-13 | 1.17E-10 |
| <a href="#">GO:0031323</a> | regulation of cellular metabolic process                       | 6.07E-13 | 1.17E-10 |
| <a href="#">GO:2000112</a> | regulation of cellular macromolecule biosynthetic process      | 6.23E-13 | 1.18E-10 |
| <a href="#">GO:0045814</a> | negative regulation of gene expression, epigenetic             | 6.74E-13 | 1.26E-10 |
| <a href="#">GO:0050658</a> | RNA transport                                                  | 6.84E-13 | 1.27E-10 |
| <a href="#">GO:0050657</a> | nucleic acid transport                                         | 6.84E-13 | 1.25E-10 |
| <a href="#">GO:0009059</a> | macromolecule biosynthetic process                             | 7.62E-13 | 1.37E-10 |
| <a href="#">GO:0051236</a> | establishment of RNA localization                              | 9.58E-13 | 1.70E-10 |
| <a href="#">GO:0051028</a> | mRNA transport                                                 | 1.08E-12 | 1.89E-10 |
| <a href="#">GO:0015931</a> | nucleobase-containing compound transport                       | 2.05E-12 | 3.55E-10 |
| <a href="#">GO:0040029</a> | regulation of gene expression, epigenetic                      | 2.83E-12 | 4.85E-10 |
| <a href="#">GO:0044763</a> | single-organism cellular process                               | 3.32E-12 | 5.63E-10 |
| <a href="#">GO:0006342</a> | chromatin silencing                                            | 3.35E-12 | 5.61E-10 |
| <a href="#">GO:0071103</a> | DNA conformation change                                        | 3.37E-12 | 5.57E-10 |

|                            |                                                         |          |          |
|----------------------------|---------------------------------------------------------|----------|----------|
| <a href="#">GO:0010468</a> | regulation of gene expression                           | 6.35E-12 | 1.04E-09 |
| <a href="#">GO:0034723</a> | DNA replication-dependent nucleosome organization       | 7.01E-12 | 1.13E-09 |
| <a href="#">GO:0006335</a> | DNA replication-dependent nucleosome assembly           | 7.01E-12 | 1.12E-09 |
| <a href="#">GO:0010638</a> | positive regulation of organelle organization           | 8.95E-12 | 1.41E-09 |
| <a href="#">GO:0009889</a> | regulation of biosynthetic process                      | 1.73E-11 | 2.70E-09 |
| <a href="#">GO:0007017</a> | microtubule-based process                               | 1.80E-11 | 2.78E-09 |
| <a href="#">GO:0071822</a> | protein complex subunit organization                    | 2.07E-11 | 3.16E-09 |
| <a href="#">GO:0000075</a> | cell cycle checkpoint                                   | 2.31E-11 | 3.49E-09 |
| <a href="#">GO:0000226</a> | microtubule cytoskeleton organization                   | 2.41E-11 | 3.60E-09 |
| <a href="#">GO:0006310</a> | DNA recombination                                       | 2.77E-11 | 4.10E-09 |
| <a href="#">GO:0042278</a> | purine nucleoside metabolic process                     | 3.01E-11 | 4.41E-09 |
| <a href="#">GO:0016458</a> | gene silencing                                          | 3.68E-11 | 5.33E-09 |
| <a href="#">GO:0006302</a> | double-strand break repair                              | 3.81E-11 | 5.46E-09 |
| <a href="#">GO:0009116</a> | nucleoside metabolic process                            | 5.06E-11 | 7.18E-09 |
| <a href="#">GO:0031326</a> | regulation of cellular biosynthetic process             | 6.52E-11 | 9.16E-09 |
| <a href="#">GO:0051252</a> | regulation of RNA metabolic process                     | 6.52E-11 | 9.08E-09 |
| <a href="#">GO:0006270</a> | DNA replication initiation                              | 9.02E-11 | 1.24E-08 |
| <a href="#">GO:0033365</a> | protein localization to organelle                       | 1.02E-10 | 1.40E-08 |
| <a href="#">GO:0046128</a> | purine ribonucleoside metabolic process                 | 1.05E-10 | 1.42E-08 |
| <a href="#">GO:0042451</a> | purine nucleoside biosynthetic process                  | 1.51E-10 | 2.02E-08 |
| <a href="#">GO:0046129</a> | purine ribonucleoside biosynthetic process              | 1.51E-10 | 2.00E-08 |
| <a href="#">GO:0044265</a> | cellular macromolecule catabolic process                | 1.64E-10 | 2.16E-08 |
| <a href="#">GO:0000819</a> | sister chromatid segregation                            | 2.07E-10 | 2.69E-08 |
| <a href="#">GO:0009119</a> | ribonucleoside metabolic process                        | 2.08E-10 | 2.69E-08 |
| <a href="#">GO:0006461</a> | protein complex assembly                                | 2.24E-10 | 2.87E-08 |
| <a href="#">GO:0009165</a> | nucleotide biosynthetic process                         | 3.16E-10 | 4.00E-08 |
| <a href="#">GO:0051641</a> | cellular localization                                   | 3.16E-10 | 3.97E-08 |
| <a href="#">GO:1901657</a> | glycosyl compound metabolic process                     | 3.39E-10 | 4.22E-08 |
| <a href="#">GO:0000724</a> | double-strand break repair via homologous recombination | 3.79E-10 | 4.68E-08 |
| <a href="#">GO:0000725</a> | recombinational repair                                  | 3.79E-10 | 4.63E-08 |
| <a href="#">GO:0034660</a> | ncRNA metabolic process                                 | 6.17E-10 | 7.47E-08 |
| <a href="#">GO:0042455</a> | ribonucleoside biosynthetic process                     | 6.97E-10 | 8.37E-08 |
| <a href="#">GO:0044699</a> | single-organism process                                 | 7.02E-10 | 8.36E-08 |
| <a href="#">GO:1901293</a> | nucleoside phosphate biosynthetic process               | 7.22E-10 | 8.52E-08 |
| <a href="#">GO:1901990</a> | regulation of mitotic cell cycle phase transition       | 7.41E-10 | 8.68E-08 |
| <a href="#">GO:0009163</a> | nucleoside biosynthetic process                         | 1.14E-09 | 1.32E-07 |
| <a href="#">GO:0006163</a> | purine nucleotide metabolic process                     | 1.36E-09 | 1.57E-07 |
| <a href="#">GO:0009057</a> | macromolecule catabolic process                         | 1.46E-09 | 1.67E-07 |
| <a href="#">GO:0016569</a> | covalent chromatin modification                         | 1.46E-09 | 1.66E-07 |
| <a href="#">GO:1901659</a> | glycosyl compound biosynthetic process                  | 1.49E-09 | 1.67E-07 |
| <a href="#">GO:0034724</a> | DNA replication-independent nucleosome organization     | 1.58E-09 | 1.76E-07 |
| <a href="#">GO:0006336</a> | DNA replication-independent nucleosome assembly         | 1.58E-09 | 1.75E-07 |
| <a href="#">GO:0034470</a> | ncRNA processing                                        | 1.69E-09 | 1.85E-07 |

|                            |                                                                         |          |          |
|----------------------------|-------------------------------------------------------------------------|----------|----------|
| <a href="#">GO:0006401</a> | RNA catabolic process                                                   | 2.04E-09 | 2.23E-07 |
| <a href="#">GO:0007093</a> | mitotic cell cycle checkpoint                                           | 2.34E-09 | 2.53E-07 |
| <a href="#">GO:0072521</a> | purine-containing compound metabolic process                            | 2.74E-09 | 2.94E-07 |
| <a href="#">GO:0006753</a> | nucleoside phosphate metabolic process                                  | 2.77E-09 | 2.95E-07 |
| <a href="#">GO:0018130</a> | heterocycle biosynthetic process                                        | 2.81E-09 | 2.97E-07 |
| <a href="#">GO:0055086</a> | nucleobase-containing small molecule metabolic process                  | 2.97E-09 | 3.12E-07 |
| <a href="#">GO:0098813</a> | nuclear chromosome segregation                                          | 3.01E-09 | 3.13E-07 |
| <a href="#">GO:0009117</a> | nucleotide metabolic process                                            | 3.03E-09 | 3.13E-07 |
| <a href="#">GO:1901566</a> | organonitrogen compound biosynthetic process                            | 3.19E-09 | 3.27E-07 |
| <a href="#">GO:0006913</a> | nucleocytoplasmic transport                                             | 3.29E-09 | 3.35E-07 |
| <a href="#">GO:1901987</a> | regulation of cell cycle phase transition                               | 3.64E-09 | 3.69E-07 |
| <a href="#">GO:0034654</a> | nucleobase-containing compound biosynthetic process                     | 3.69E-09 | 3.71E-07 |
| <a href="#">GO:0000070</a> | mitotic sister chromatid segregation                                    | 5.94E-09 | 5.92E-07 |
| <a href="#">GO:0051169</a> | nuclear transport                                                       | 6.01E-09 | 5.95E-07 |
| <a href="#">GO:0019438</a> | aromatic compound biosynthetic process                                  | 6.58E-09 | 6.46E-07 |
| <a href="#">GO:0006796</a> | phosphate-containing compound metabolic process                         | 7.23E-09 | 7.06E-07 |
| <a href="#">GO:0006275</a> | regulation of DNA replication                                           | 7.39E-09 | 7.16E-07 |
| <a href="#">GO:2000113</a> | negative regulation of cellular macromolecule biosynthetic process      | 7.83E-09 | 7.54E-07 |
| <a href="#">GO:0016072</a> | rRNA metabolic process                                                  | 8.09E-09 | 7.74E-07 |
| <a href="#">GO:0045934</a> | negative regulation of nucleobase-containing compound metabolic process | 8.79E-09 | 8.35E-07 |
| <a href="#">GO:0006793</a> | phosphorus metabolic process                                            | 9.84E-09 | 9.28E-07 |
| <a href="#">GO:0072522</a> | purine-containing compound biosynthetic process                         | 1.01E-08 | 9.42E-07 |
| <a href="#">GO:0051290</a> | protein heterotetramerization                                           | 1.04E-08 | 9.68E-07 |
| <a href="#">GO:0006164</a> | purine nucleotide biosynthetic process                                  | 1.08E-08 | 1.00E-06 |
| <a href="#">GO:0051262</a> | protein tetramerization                                                 | 1.08E-08 | 9.96E-07 |
| <a href="#">GO:0051783</a> | regulation of nuclear division                                          | 1.25E-08 | 1.14E-06 |
| <a href="#">GO:2001141</a> | regulation of RNA biosynthetic process                                  | 1.35E-08 | 1.22E-06 |
| <a href="#">GO:0009259</a> | ribonucleotide metabolic process                                        | 1.56E-08 | 1.41E-06 |
| <a href="#">GO:0018193</a> | peptidyl-amino acid modification                                        | 1.62E-08 | 1.45E-06 |
| <a href="#">GO:0045930</a> | negative regulation of mitotic cell cycle                               | 1.86E-08 | 1.66E-06 |
| <a href="#">GO:0010558</a> | negative regulation of macromolecule biosynthetic process               | 2.15E-08 | 1.90E-06 |
| <a href="#">GO:2001251</a> | negative regulation of chromosome organization                          | 2.39E-08 | 2.10E-06 |
| <a href="#">GO:0006402</a> | mRNA catabolic process                                                  | 2.41E-08 | 2.10E-06 |
| <a href="#">GO:0030261</a> | chromosome condensation                                                 | 2.86E-08 | 2.48E-06 |
| <a href="#">GO:0006355</a> | regulation of transcription, DNA-templated                              | 2.89E-08 | 2.49E-06 |
| <a href="#">GO:0009150</a> | purine ribonucleotide metabolic process                                 | 2.93E-08 | 2.51E-06 |
| <a href="#">GO:1902275</a> | regulation of chromatin organization                                    | 3.05E-08 | 2.60E-06 |
| <a href="#">GO:1903506</a> | regulation of nucleic acid-templated transcription                      | 3.11E-08 | 2.64E-06 |
| <a href="#">GO:1901362</a> | organic cyclic compound biosynthetic process                            | 3.35E-08 | 2.82E-06 |
| <a href="#">GO:0006950</a> | response to stress                                                      | 3.57E-08 | 2.98E-06 |
| <a href="#">GO:0006364</a> | rRNA processing                                                         | 4.12E-08 | 3.42E-06 |

|                            |                                                            |          |          |
|----------------------------|------------------------------------------------------------|----------|----------|
| <a href="#">GO:0051172</a> | negative regulation of nitrogen compound metabolic process | 4.21E-08 | 3.48E-06 |
| <a href="#">GO:0090329</a> | regulation of DNA-dependent DNA replication                | 4.90E-08 | 4.03E-06 |
| <a href="#">GO:0019693</a> | ribose phosphate metabolic process                         | 4.99E-08 | 4.07E-06 |
| <a href="#">GO:0007088</a> | regulation of mitotic nuclear division                     | 5.39E-08 | 4.38E-06 |
| <a href="#">GO:0010629</a> | negative regulation of gene expression                     | 6.12E-08 | 4.94E-06 |
| <a href="#">GO:0051649</a> | establishment of localization in cell                      | 6.34E-08 | 5.09E-06 |
| <a href="#">GO:0051130</a> | positive regulation of cellular component organization     | 6.41E-08 | 5.12E-06 |
| <a href="#">GO:0034502</a> | protein localization to chromosome                         | 7.31E-08 | 5.80E-06 |
| <a href="#">GO:0010948</a> | negative regulation of cell cycle process                  | 7.75E-08 | 6.12E-06 |
| <a href="#">GO:0044770</a> | cell cycle phase transition                                | 8.35E-08 | 6.56E-06 |
| <a href="#">GO:0007076</a> | mitotic chromosome condensation                            | 8.57E-08 | 6.69E-06 |
| <a href="#">GO:0009890</a> | negative regulation of biosynthetic process                | 8.66E-08 | 6.73E-06 |
| <a href="#">GO:0051168</a> | nuclear export                                             | 8.75E-08 | 6.76E-06 |
| <a href="#">GO:1903827</a> | regulation of cellular protein localization                | 1.03E-07 | 7.88E-06 |
| <a href="#">GO:0033036</a> | macromolecule localization                                 | 1.06E-07 | 8.12E-06 |
| <a href="#">GO:0051128</a> | regulation of cellular component organization              | 1.34E-07 | 1.02E-05 |
| <a href="#">GO:0000387</a> | spliceosomal snRNP assembly                                | 1.42E-07 | 1.07E-05 |
| <a href="#">GO:0006412</a> | translation                                                | 1.44E-07 | 1.08E-05 |
| <a href="#">GO:0000956</a> | nuclear-transcribed mRNA catabolic process                 | 1.47E-07 | 1.10E-05 |
| <a href="#">GO:1904666</a> | regulation of ubiquitin protein ligase activity            | 1.57E-07 | 1.17E-05 |
| <a href="#">GO:0009123</a> | nucleoside monophosphate metabolic process                 | 1.67E-07 | 1.24E-05 |
| <a href="#">GO:0090407</a> | organophosphate biosynthetic process                       | 1.68E-07 | 1.24E-05 |
| <a href="#">GO:0045786</a> | negative regulation of cell cycle                          | 1.90E-07 | 1.39E-05 |
| <a href="#">GO:0031327</a> | negative regulation of cellular biosynthetic process       | 1.96E-07 | 1.43E-05 |
| <a href="#">GO:0007051</a> | spindle organization                                       | 2.03E-07 | 1.47E-05 |
| <a href="#">GO:1901991</a> | negative regulation of mitotic cell cycle phase transition | 2.13E-07 | 1.54E-05 |
| <a href="#">GO:0070646</a> | protein modification by small protein removal              | 2.16E-07 | 1.55E-05 |
| <a href="#">GO:0017038</a> | protein import                                             | 2.26E-07 | 1.61E-05 |
| <a href="#">GO:0009126</a> | purine nucleoside monophosphate metabolic process          | 2.32E-07 | 1.65E-05 |
| <a href="#">GO:0009167</a> | purine ribonucleoside monophosphate metabolic process      | 2.32E-07 | 1.64E-05 |
| <a href="#">GO:0034655</a> | nucleobase-containing compound catabolic process           | 2.41E-07 | 1.69E-05 |
| <a href="#">GO:0008104</a> | protein localization                                       | 2.49E-07 | 1.74E-05 |
| <a href="#">GO:0009260</a> | ribonucleotide biosynthetic process                        | 2.53E-07 | 1.76E-05 |
| <a href="#">GO:0046907</a> | intracellular transport                                    | 3.16E-07 | 2.19E-05 |
| <a href="#">GO:0034504</a> | protein localization to nucleus                            | 3.46E-07 | 2.38E-05 |
| <a href="#">GO:0009892</a> | negative regulation of metabolic process                   | 3.46E-07 | 2.37E-05 |
| <a href="#">GO:0009161</a> | ribonucleoside monophosphate metabolic process             | 3.58E-07 | 2.44E-05 |
| <a href="#">GO:0009141</a> | nucleoside triphosphate metabolic process                  | 3.59E-07 | 2.44E-05 |
| <a href="#">GO:0032200</a> | telomere organization                                      | 3.72E-07 | 2.51E-05 |
| <a href="#">GO:0006323</a> | DNA packaging                                              | 3.78E-07 | 2.54E-05 |



|                            |                                                                                      |          |          |
|----------------------------|--------------------------------------------------------------------------------------|----------|----------|
| <a href="#">GO:0010605</a> | negative regulation of macromolecule metabolic process                               | 3.88E-07 | 2.60E-05 |
| <a href="#">GO:0045184</a> | establishment of protein localization                                                | 3.98E-07 | 2.65E-05 |
| <a href="#">GO:0051253</a> | negative regulation of RNA metabolic process                                         | 4.24E-07 | 2.81E-05 |
| <a href="#">GO:0009152</a> | purine ribonucleotide biosynthetic process                                           | 4.31E-07 | 2.84E-05 |
| <a href="#">GO:0046390</a> | ribose phosphate biosynthetic process                                                | 4.35E-07 | 2.86E-05 |
| <a href="#">GO:0070727</a> | cellular macromolecule localization                                                  | 4.46E-07 | 2.91E-05 |
| <a href="#">GO:0070647</a> | protein modification by small protein conjugation or removal                         | 4.79E-07 | 3.11E-05 |
| <a href="#">GO:0048523</a> | negative regulation of cellular process                                              | 4.80E-07 | 3.11E-05 |
| <a href="#">GO:0032392</a> | DNA geometric change                                                                 | 5.22E-07 | 3.36E-05 |
| <a href="#">GO:0006457</a> | protein folding                                                                      | 5.96E-07 | 3.83E-05 |
| <a href="#">GO:0044270</a> | cellular nitrogen compound catabolic process                                         | 6.03E-07 | 3.85E-05 |
| <a href="#">GO:0051983</a> | regulation of chromosome segregation                                                 | 6.85E-07 | 4.36E-05 |
| <a href="#">GO:0034613</a> | cellular protein localization                                                        | 7.18E-07 | 4.55E-05 |
| <a href="#">GO:0051054</a> | positive regulation of DNA metabolic process                                         | 7.27E-07 | 4.58E-05 |
| <a href="#">GO:0046700</a> | heterocycle catabolic process                                                        | 7.68E-07 | 4.82E-05 |
| <a href="#">GO:1901988</a> | negative regulation of cell cycle phase transition                                   | 8.82E-07 | 5.51E-05 |
| <a href="#">GO:0006268</a> | DNA unwinding involved in DNA replication                                            | 8.85E-07 | 5.51E-05 |
| <a href="#">GO:1905269</a> | positive regulation of chromatin organization                                        | 9.52E-07 | 5.89E-05 |
| <a href="#">GO:0019637</a> | organophosphate metabolic process                                                    | 9.53E-07 | 5.88E-05 |
| <a href="#">GO:1902589</a> | single-organism organelle organization                                               | 1.00E-06 | 6.14E-05 |
| <a href="#">GO:0043043</a> | peptide biosynthetic process                                                         | 1.10E-06 | 6.71E-05 |
| <a href="#">GO:0033157</a> | regulation of intracellular protein transport                                        | 1.11E-06 | 6.77E-05 |
| <a href="#">GO:1901564</a> | organonitrogen compound metabolic process                                            | 1.13E-06 | 6.83E-05 |
| <a href="#">GO:0048519</a> | negative regulation of biological process                                            | 1.21E-06 | 7.32E-05 |
| <a href="#">GO:0019439</a> | aromatic compound catabolic process                                                  | 1.22E-06 | 7.34E-05 |
| <a href="#">GO:0007010</a> | cytoskeleton organization                                                            | 1.27E-06 | 7.60E-05 |
| <a href="#">GO:0006261</a> | DNA-dependent DNA replication                                                        | 1.32E-06 | 7.88E-05 |
| <a href="#">GO:0000723</a> | telomere maintenance                                                                 | 1.36E-06 | 8.09E-05 |
| <a href="#">GO:0007080</a> | mitotic metaphase plate congression                                                  | 1.44E-06 | 8.51E-05 |
| <a href="#">GO:0032508</a> | DNA duplex unwinding                                                                 | 1.49E-06 | 8.78E-05 |
| <a href="#">GO:0009144</a> | purine nucleoside triphosphate metabolic process                                     | 1.53E-06 | 8.97E-05 |
| <a href="#">GO:0072594</a> | establishment of protein localization to organelle                                   | 1.58E-06 | 9.23E-05 |
| <a href="#">GO:0071459</a> | protein localization to chromosome, centromeric region                               | 1.79E-06 | 1.04E-04 |
| <a href="#">GO:0031324</a> | negative regulation of cellular metabolic process                                    | 1.81E-06 | 1.05E-04 |
| <a href="#">GO:0031056</a> | regulation of histone modification                                                   | 1.92E-06 | 1.10E-04 |
| <a href="#">GO:0000377</a> | RNA splicing, via transesterification reactions with bulged adenosine as nucleophile | 1.96E-06 | 1.12E-04 |
| <a href="#">GO:0000398</a> | mRNA splicing, via spliceosome                                                       | 1.96E-06 | 1.12E-04 |
| <a href="#">GO:1901137</a> | carbohydrate derivative biosynthetic process                                         | 1.99E-06 | 1.13E-04 |
| <a href="#">GO:0031570</a> | DNA integrity checkpoint                                                             | 2.20E-06 | 1.24E-04 |
| <a href="#">GO:0000375</a> | RNA splicing, via transesterification reactions                                      | 2.33E-06 | 1.32E-04 |
| <a href="#">GO:0044772</a> | mitotic cell cycle phase transition                                                  | 2.44E-06 | 1.37E-04 |
| <a href="#">GO:0045892</a> | negative regulation of transcription, DNA-templated                                  | 2.53E-06 | 1.42E-04 |

|                            |                                                             |          |          |
|----------------------------|-------------------------------------------------------------|----------|----------|
| <a href="#">GO:0051310</a> | metaphase plate congression                                 | 2.69E-06 | 1.50E-04 |
| <a href="#">GO:1902679</a> | negative regulation of RNA biosynthetic process             | 2.76E-06 | 1.53E-04 |
| <a href="#">GO:1901135</a> | carbohydrate derivative metabolic process                   | 2.80E-06 | 1.55E-04 |
| <a href="#">GO:0048522</a> | positive regulation of cellular process                     | 2.97E-06 | 1.64E-04 |
| <a href="#">GO:1904668</a> | positive regulation of ubiquitin protein ligase activity    | 3.07E-06 | 1.68E-04 |
| <a href="#">GO:0051291</a> | protein heterooligomerization                               | 3.38E-06 | 1.85E-04 |
| <a href="#">GO:0007062</a> | sister chromatid cohesion                                   | 3.76E-06 | 2.05E-04 |
| <a href="#">GO:0006606</a> | protein import into nucleus                                 | 3.80E-06 | 2.06E-04 |
| <a href="#">GO:1902593</a> | single-organism nuclear import                              | 3.80E-06 | 2.05E-04 |
| <a href="#">GO:1903507</a> | negative regulation of nucleic acid-templated transcription | 3.86E-06 | 2.08E-04 |
| <a href="#">GO:0032386</a> | regulation of intracellular transport                       | 3.87E-06 | 2.08E-04 |
| <a href="#">GO:0006405</a> | RNA export from nucleus                                     | 3.95E-06 | 2.11E-04 |
| <a href="#">GO:0009199</a> | ribonucleoside triphosphate metabolic process               | 4.18E-06 | 2.23E-04 |
| <a href="#">GO:0034248</a> | regulation of cellular amide metabolic process              | 4.30E-06 | 2.28E-04 |
| <a href="#">GO:0050684</a> | regulation of mRNA processing                               | 4.43E-06 | 2.34E-04 |
| <a href="#">GO:0051170</a> | nuclear import                                              | 4.65E-06 | 2.45E-04 |
| <a href="#">GO:0016310</a> | phosphorylation                                             | 4.67E-06 | 2.45E-04 |
| <a href="#">GO:0044085</a> | cellular component biogenesis                               | 4.87E-06 | 2.55E-04 |
| <a href="#">GO:0051053</a> | negative regulation of DNA metabolic process                | 4.96E-06 | 2.58E-04 |
| <a href="#">GO:0010639</a> | negative regulation of organelle organization               | 5.01E-06 | 2.60E-04 |
| <a href="#">GO:0006417</a> | regulation of translation                                   | 5.16E-06 | 2.67E-04 |
| <a href="#">GO:1903046</a> | meiotic cell cycle process                                  | 5.96E-06 | 3.07E-04 |
| <a href="#">GO:1901361</a> | organic cyclic compound catabolic process                   | 5.97E-06 | 3.06E-04 |
| <a href="#">GO:0042127</a> | regulation of cell proliferation                            | 6.36E-06 | 3.25E-04 |
| <a href="#">GO:1903829</a> | positive regulation of cellular protein localization        | 6.85E-06 | 3.49E-04 |
| <a href="#">GO:0006886</a> | intracellular protein transport                             | 8.06E-06 | 4.09E-04 |
| <a href="#">GO:0051656</a> | establishment of organelle localization                     | 8.29E-06 | 4.19E-04 |
| <a href="#">GO:0048518</a> | positive regulation of biological process                   | 8.30E-06 | 4.18E-04 |
| <a href="#">GO:0000077</a> | DNA damage checkpoint                                       | 8.74E-06 | 4.39E-04 |
| <a href="#">GO:1901976</a> | regulation of cell cycle checkpoint                         | 8.94E-06 | 4.47E-04 |
| <a href="#">GO:0006406</a> | mRNA export from nucleus                                    | 9.25E-06 | 4.61E-04 |
| <a href="#">GO:0010608</a> | posttranscriptional regulation of gene expression           | 9.74E-06 | 4.84E-04 |
| <a href="#">GO:0031058</a> | positive regulation of histone modification                 | 1.02E-05 | 5.03E-04 |
| <a href="#">GO:0046822</a> | regulation of nucleocytoplasmic transport                   | 1.14E-05 | 5.62E-04 |
| <a href="#">GO:0000910</a> | cytokinesis                                                 | 1.16E-05 | 5.69E-04 |
| <a href="#">GO:0051246</a> | regulation of protein metabolic process                     | 1.17E-05 | 5.71E-04 |
| <a href="#">GO:1903533</a> | regulation of protein targeting                             | 1.18E-05 | 5.74E-04 |
| <a href="#">GO:0051640</a> | organelle localization                                      | 1.21E-05 | 5.90E-04 |
| <a href="#">GO:0051098</a> | regulation of binding                                       | 1.24E-05 | 6.03E-04 |
| <a href="#">GO:0044843</a> | cell cycle G1/S phase transition                            | 1.28E-05 | 6.20E-04 |
| <a href="#">GO:0000082</a> | G1/S transition of mitotic cell cycle                       | 1.28E-05 | 6.18E-04 |
| <a href="#">GO:0009205</a> | purine ribonucleoside triphosphate metabolic process        | 1.32E-05 | 6.35E-04 |
| <a href="#">GO:0071478</a> | cellular response to radiation                              | 1.46E-05 | 6.98E-04 |
| <a href="#">GO:0051297</a> | centrosome organization                                     | 1.47E-05 | 6.99E-04 |



|                            |                                                                                           |          |          |
|----------------------------|-------------------------------------------------------------------------------------------|----------|----------|
| <a href="#">GO:0060341</a> | regulation of cellular localization                                                       | 1.52E-05 | 7.23E-04 |
| <a href="#">GO:0090316</a> | positive regulation of intracellular protein transport                                    | 1.61E-05 | 7.60E-04 |
| <a href="#">GO:0045653</a> | negative regulation of megakaryocyte differentiation                                      | 1.91E-05 | 9.02E-04 |
| <a href="#">GO:0051303</a> | establishment of chromosome localization                                                  | 1.98E-05 | 9.31E-04 |
| <a href="#">GO:0031023</a> | microtubule organizing center organization                                                | 1.99E-05 | 9.32E-04 |
| <a href="#">GO:0033047</a> | regulation of mitotic sister chromatid segregation                                        | 2.13E-05 | 9.96E-04 |
| <a href="#">GO:1903311</a> | regulation of mRNA metabolic process                                                      | 2.15E-05 | 1.00E-03 |
| <a href="#">GO:0090231</a> | regulation of spindle checkpoint                                                          | 2.22E-05 | 1.03E-03 |
| <a href="#">GO:0002683</a> | negative regulation of immune system process                                              | 2.24E-05 | 1.03E-03 |
| <a href="#">GO:0050000</a> | chromosome localization                                                                   | 2.25E-05 | 1.04E-03 |
| <a href="#">GO:0006518</a> | peptide metabolic process                                                                 | 2.32E-05 | 1.06E-03 |
| <a href="#">GO:0009124</a> | nucleoside monophosphate biosynthetic process                                             | 2.45E-05 | 1.12E-03 |
| <a href="#">GO:0031497</a> | chromatin assembly                                                                        | 2.54E-05 | 1.16E-03 |
| <a href="#">GO:0043604</a> | amide biosynthetic process                                                                | 2.64E-05 | 1.20E-03 |
| <a href="#">GO:0051438</a> | regulation of ubiquitin-protein transferase activity                                      | 2.65E-05 | 1.20E-03 |
| <a href="#">GO:0046034</a> | ATP metabolic process                                                                     | 2.70E-05 | 1.22E-03 |
| <a href="#">GO:0000727</a> | double-strand break repair via break-induced replication                                  | 2.73E-05 | 1.23E-03 |
| <a href="#">GO:0022613</a> | ribonucleoprotein complex biogenesis                                                      | 3.01E-05 | 1.35E-03 |
| <a href="#">GO:0009127</a> | purine nucleoside monophosphate biosynthetic process                                      | 3.08E-05 | 1.38E-03 |
| <a href="#">GO:0009168</a> | purine ribonucleoside monophosphate biosynthetic process                                  | 3.08E-05 | 1.37E-03 |
| <a href="#">GO:0045931</a> | positive regulation of mitotic cell cycle                                                 | 3.12E-05 | 1.39E-03 |
| <a href="#">GO:0018205</a> | peptidyl-lysine modification                                                              | 3.13E-05 | 1.39E-03 |
| <a href="#">GO:0033045</a> | regulation of sister chromatid segregation                                                | 3.19E-05 | 1.41E-03 |
| <a href="#">GO:0071479</a> | cellular response to ionizing radiation                                                   | 3.22E-05 | 1.42E-03 |
| <a href="#">GO:0006458</a> | 'de novo' protein folding                                                                 | 3.25E-05 | 1.43E-03 |
| <a href="#">GO:0051084</a> | 'de novo' posttranslational protein folding                                               | 3.25E-05 | 1.42E-03 |
| <a href="#">GO:0009263</a> | deoxyribonucleotide biosynthetic process                                                  | 3.26E-05 | 1.42E-03 |
| <a href="#">GO:0009145</a> | purine nucleoside triphosphate biosynthetic process                                       | 3.63E-05 | 1.58E-03 |
| <a href="#">GO:0044248</a> | cellular catabolic process                                                                | 4.06E-05 | 1.76E-03 |
| <a href="#">GO:0031055</a> | chromatin remodeling at centromere                                                        | 4.24E-05 | 1.83E-03 |
| <a href="#">GO:0051259</a> | protein oligomerization                                                                   | 4.35E-05 | 1.87E-03 |
| <a href="#">GO:0002504</a> | antigen processing and presentation of peptide or polysaccharide antigen via MHC class II | 4.35E-05 | 1.87E-03 |
| <a href="#">GO:0002495</a> | antigen processing and presentation of peptide antigen via MHC class II                   | 4.35E-05 | 1.87E-03 |
| <a href="#">GO:0019886</a> | antigen processing and presentation of exogenous peptide antigen via MHC class II         | 4.35E-05 | 1.86E-03 |
| <a href="#">GO:0051603</a> | proteolysis involved in cellular protein catabolic process                                | 4.36E-05 | 1.86E-03 |
| <a href="#">GO:0042493</a> | response to drug                                                                          | 4.39E-05 | 1.86E-03 |
| <a href="#">GO:0015031</a> | protein transport                                                                         | 4.42E-05 | 1.87E-03 |
| <a href="#">GO:0009201</a> | ribonucleoside triphosphate biosynthetic process                                          | 4.51E-05 | 1.90E-03 |
| <a href="#">GO:0000245</a> | spliceosomal complex assembly                                                             | 5.44E-05 | 2.29E-03 |

|                            |                                                                                                   |          |          |
|----------------------------|---------------------------------------------------------------------------------------------------|----------|----------|
| <a href="#">GO:0032268</a> | regulation of cellular protein metabolic process                                                  | 5.63E-05 | 2.36E-03 |
| <a href="#">GO:0031577</a> | spindle checkpoint                                                                                | 5.65E-05 | 2.37E-03 |
| <a href="#">GO:0000184</a> | nuclear-transcribed mRNA catabolic process, nonsense-mediated decay                               | 5.76E-05 | 2.40E-03 |
| <a href="#">GO:0009142</a> | nucleoside triphosphate biosynthetic process                                                      | 5.93E-05 | 2.47E-03 |
| <a href="#">GO:0009156</a> | ribonucleoside monophosphate biosynthetic process                                                 | 5.93E-05 | 2.46E-03 |
| <a href="#">GO:0008284</a> | positive regulation of cell proliferation                                                         | 6.33E-05 | 2.62E-03 |
| <a href="#">GO:0045787</a> | positive regulation of cell cycle                                                                 | 6.34E-05 | 2.61E-03 |
| <a href="#">GO:0051225</a> | spindle assembly                                                                                  | 6.64E-05 | 2.73E-03 |
| <a href="#">GO:0043484</a> | regulation of RNA splicing                                                                        | 6.65E-05 | 2.72E-03 |
| <a href="#">GO:0010965</a> | regulation of mitotic sister chromatid separation                                                 | 6.94E-05 | 2.84E-03 |
| <a href="#">GO:0006338</a> | chromatin remodeling                                                                              | 7.21E-05 | 2.94E-03 |
| <a href="#">GO:0007100</a> | mitotic centrosome separation                                                                     | 7.33E-05 | 2.98E-03 |
| <a href="#">GO:1901575</a> | organic substance catabolic process                                                               | 7.82E-05 | 3.17E-03 |
| <a href="#">GO:2001020</a> | regulation of response to DNA damage stimulus                                                     | 7.92E-05 | 3.20E-03 |
| <a href="#">GO:0071353</a> | cellular response to interleukin-4                                                                | 8.20E-05 | 3.30E-03 |
| <a href="#">GO:0030951</a> | establishment or maintenance of microtubule cytoskeleton polarity                                 | 8.38E-05 | 3.37E-03 |
| <a href="#">GO:0009314</a> | response to radiation                                                                             | 8.47E-05 | 3.39E-03 |
| <a href="#">GO:0015937</a> | coenzyme A biosynthetic process                                                                   | 8.96E-05 | 3.58E-03 |
| <a href="#">GO:0044711</a> | single-organism biosynthetic process                                                              | 9.36E-05 | 3.73E-03 |
| <a href="#">GO:0007064</a> | mitotic sister chromatid cohesion                                                                 | 9.84E-05 | 3.91E-03 |
| <a href="#">GO:0032388</a> | positive regulation of intracellular transport                                                    | 1.01E-04 | 4.01E-03 |
| <a href="#">GO:0009411</a> | response to UV                                                                                    | 1.05E-04 | 4.13E-03 |
| <a href="#">GO:2000104</a> | negative regulation of DNA-dependent DNA replication                                              | 1.06E-04 | 4.18E-03 |
| <a href="#">GO:0043632</a> | modification-dependent macromolecule catabolic process                                            | 1.13E-04 | 4.45E-03 |
| <a href="#">GO:0031647</a> | regulation of protein stability                                                                   | 1.15E-04 | 4.49E-03 |
| <a href="#">GO:0045870</a> | positive regulation of single stranded viral RNA replication via double stranded DNA intermediate | 1.17E-04 | 4.57E-03 |
| <a href="#">GO:0016073</a> | snRNA metabolic process                                                                           | 1.17E-04 | 4.56E-03 |
| <a href="#">GO:0030071</a> | regulation of mitotic metaphase/anaphase transition                                               | 1.20E-04 | 4.67E-03 |
| <a href="#">GO:0007052</a> | mitotic spindle organization                                                                      | 1.25E-04 | 4.83E-03 |
| <a href="#">GO:0032880</a> | regulation of protein localization                                                                | 1.34E-04 | 5.17E-03 |
| <a href="#">GO:2000278</a> | regulation of DNA biosynthetic process                                                            | 1.35E-04 | 5.20E-03 |
| <a href="#">GO:0043414</a> | macromolecule methylation                                                                         | 1.36E-04 | 5.24E-03 |
| <a href="#">GO:0051188</a> | cofactor biosynthetic process                                                                     | 1.45E-04 | 5.56E-03 |
| <a href="#">GO:2000501</a> | regulation of natural killer cell chemotaxis                                                      | 1.51E-04 | 5.76E-03 |
| <a href="#">GO:2000503</a> | positive regulation of natural killer cell chemotaxis                                             | 1.51E-04 | 5.75E-03 |
| <a href="#">GO:0043624</a> | cellular protein complex disassembly                                                              | 1.52E-04 | 5.79E-03 |
| <a href="#">GO:0006351</a> | transcription, DNA-templated                                                                      | 1.53E-04 | 5.79E-03 |
| <a href="#">GO:0045652</a> | regulation of megakaryocyte differentiation                                                       | 1.54E-04 | 5.83E-03 |
| <a href="#">GO:2000341</a> | regulation of chemokine (C-X-C motif) ligand 2 production                                         | 1.57E-04 | 5.90E-03 |

|                            |                                                                    |          |          |
|----------------------------|--------------------------------------------------------------------|----------|----------|
| <a href="#">GO:0050792</a> | regulation of viral process                                        | 1.57E-04 | 5.89E-03 |
| <a href="#">GO:0097659</a> | nucleic acid-templated transcription                               | 1.59E-04 | 5.97E-03 |
| <a href="#">GO:0006998</a> | nuclear envelope organization                                      | 1.60E-04 | 5.99E-03 |
| <a href="#">GO:1903707</a> | negative regulation of hemopoiesis                                 | 1.62E-04 | 6.04E-03 |
| <a href="#">GO:0051443</a> | positive regulation of ubiquitin-protein transferase activity      | 1.63E-04 | 6.05E-03 |
| <a href="#">GO:0051984</a> | positive regulation of chromosome segregation                      | 1.63E-04 | 6.03E-03 |
| <a href="#">GO:2000816</a> | negative regulation of mitotic sister chromatid separation         | 1.68E-04 | 6.21E-03 |
| <a href="#">GO:0071174</a> | mitotic spindle checkpoint                                         | 1.68E-04 | 6.20E-03 |
| <a href="#">GO:0045841</a> | negative regulation of mitotic metaphase/anaphase transition       | 1.68E-04 | 6.18E-03 |
| <a href="#">GO:1901992</a> | positive regulation of mitotic cell cycle phase transition         | 1.75E-04 | 6.43E-03 |
| <a href="#">GO:0090068</a> | positive regulation of cell cycle process                          | 1.76E-04 | 6.42E-03 |
| <a href="#">GO:2000343</a> | positive regulation of chemokine (C-X-C motif) ligand 2 production | 1.81E-04 | 6.60E-03 |
| <a href="#">GO:0032774</a> | RNA biosynthetic process                                           | 1.81E-04 | 6.59E-03 |
| <a href="#">GO:0034033</a> | purine nucleoside bisphosphate biosynthetic process                | 1.83E-04 | 6.63E-03 |
| <a href="#">GO:0034030</a> | ribonucleoside bisphosphate biosynthetic process                   | 1.83E-04 | 6.61E-03 |
| <a href="#">GO:0033866</a> | nucleoside bisphosphate biosynthetic process                       | 1.83E-04 | 6.60E-03 |
| <a href="#">GO:0016570</a> | histone modification                                               | 1.86E-04 | 6.69E-03 |
| <a href="#">GO:0009206</a> | purine ribonucleoside triphosphate biosynthetic process            | 1.89E-04 | 6.81E-03 |
| <a href="#">GO:0045005</a> | DNA-dependent DNA replication maintenance of fidelity              | 1.92E-04 | 6.88E-03 |
| <a href="#">GO:0071168</a> | protein localization to chromatin                                  | 2.00E-04 | 7.13E-03 |
| <a href="#">GO:0002478</a> | antigen processing and presentation of exogenous peptide antigen   | 2.03E-04 | 7.24E-03 |
| <a href="#">GO:0000028</a> | ribosomal small subunit assembly                                   | 2.20E-04 | 7.84E-03 |
| <a href="#">GO:0019941</a> | modification-dependent protein catabolic process                   | 2.27E-04 | 8.04E-03 |
| <a href="#">GO:1902099</a> | regulation of metaphase/anaphase transition of cell cycle          | 2.30E-04 | 8.16E-03 |
| <a href="#">GO:0051299</a> | centrosome separation                                              | 2.32E-04 | 8.20E-03 |
| <a href="#">GO:0060968</a> | regulation of gene silencing                                       | 2.33E-04 | 8.20E-03 |
| <a href="#">GO:0051186</a> | cofactor metabolic process                                         | 2.50E-04 | 8.77E-03 |
| <a href="#">GO:0007084</a> | mitotic nuclear envelope reassembly                                | 2.54E-04 | 8.90E-03 |
| <a href="#">GO:0006511</a> | ubiquitin-dependent protein catabolic process                      | 2.56E-04 | 8.95E-03 |
| <a href="#">GO:0046831</a> | regulation of RNA export from nucleus                              | 2.61E-04 | 9.09E-03 |
| <a href="#">GO:1902850</a> | microtubule cytoskeleton organization involved in mitosis          | 2.62E-04 | 9.12E-03 |
| <a href="#">GO:0090307</a> | mitotic spindle assembly                                           | 2.62E-04 | 9.10E-03 |
| <a href="#">GO:0042254</a> | ribosome biogenesis                                                | 2.66E-04 | 9.20E-03 |
| <a href="#">GO:0016180</a> | snRNA processing                                                   | 2.69E-04 | 9.29E-03 |
| <a href="#">GO:0070670</a> | response to interleukin-4                                          | 2.75E-04 | 9.49E-03 |

|                            |                                                                            |          |          |
|----------------------------|----------------------------------------------------------------------------|----------|----------|
| <a href="#">GO:0006241</a> | CTP biosynthetic process                                                   | 2.77E-04 | 9.53E-03 |
| <a href="#">GO:0046036</a> | CTP metabolic process                                                      | 2.77E-04 | 9.51E-03 |
| <a href="#">GO:0010212</a> | response to ionizing radiation                                             | 2.92E-04 | 9.99E-03 |
| <a href="#">GO:0051985</a> | negative regulation of chromosome segregation                              | 2.96E-04 | 1.01E-02 |
| <a href="#">GO:1901989</a> | positive regulation of cell cycle phase transition                         | 3.00E-04 | 1.02E-02 |
| <a href="#">GO:0015936</a> | coenzyme A metabolic process                                               | 3.01E-04 | 1.02E-02 |
| <a href="#">GO:0051293</a> | establishment of spindle localization                                      | 3.10E-04 | 1.05E-02 |
| <a href="#">GO:0007094</a> | mitotic spindle assembly checkpoint                                        | 3.10E-04 | 1.05E-02 |
| <a href="#">GO:0008156</a> | negative regulation of DNA replication                                     | 3.12E-04 | 1.05E-02 |
| <a href="#">GO:0010389</a> | regulation of G2/M transition of mitotic cell cycle                        | 3.18E-04 | 1.07E-02 |
| <a href="#">GO:0007569</a> | cell aging                                                                 | 3.28E-04 | 1.10E-02 |
| <a href="#">GO:1902580</a> | single-organism cellular localization                                      | 3.38E-04 | 1.13E-02 |
| <a href="#">GO:0018105</a> | peptidyl-serine phosphorylation                                            | 3.51E-04 | 1.17E-02 |
| <a href="#">GO:0050896</a> | response to stimulus                                                       | 3.52E-04 | 1.17E-02 |
| <a href="#">GO:0000244</a> | spliceosomal tri-snRNP complex assembly                                    | 3.53E-04 | 1.17E-02 |
| <a href="#">GO:0008608</a> | attachment of spindle microtubules to kinetochore                          | 3.53E-04 | 1.17E-02 |
| <a href="#">GO:0000338</a> | protein deneddylation                                                      | 3.56E-04 | 1.18E-02 |
| <a href="#">GO:0071173</a> | spindle assembly checkpoint                                                | 3.66E-04 | 1.21E-02 |
| <a href="#">GO:0046824</a> | positive regulation of nucleocytoplasmic transport                         | 3.73E-04 | 1.23E-02 |
| <a href="#">GO:0032434</a> | regulation of proteasomal ubiquitin-dependent protein catabolic process    | 3.82E-04 | 1.26E-02 |
| <a href="#">GO:0071426</a> | ribonucleoprotein complex export from nucleus                              | 3.94E-04 | 1.29E-02 |
| <a href="#">GO:1902100</a> | negative regulation of metaphase/anaphase transition of cell cycle         | 3.97E-04 | 1.30E-02 |
| <a href="#">GO:0033048</a> | negative regulation of mitotic sister chromatid segregation                | 3.97E-04 | 1.30E-02 |
| <a href="#">GO:1903320</a> | regulation of protein modification by small protein conjugation or removal | 4.11E-04 | 1.34E-02 |
| <a href="#">GO:1903706</a> | regulation of hemopoiesis                                                  | 4.11E-04 | 1.33E-02 |
| <a href="#">GO:0000281</a> | mitotic cytokinesis                                                        | 4.12E-04 | 1.33E-02 |
| <a href="#">GO:0002376</a> | immune system process                                                      | 4.14E-04 | 1.34E-02 |
| <a href="#">GO:0042110</a> | T cell activation                                                          | 4.19E-04 | 1.35E-02 |
| <a href="#">GO:0040001</a> | establishment of mitotic spindle localization                              | 4.21E-04 | 1.35E-02 |
| <a href="#">GO:0009209</a> | pyrimidine ribonucleoside triphosphate biosynthetic process                | 4.32E-04 | 1.39E-02 |
| <a href="#">GO:0071214</a> | cellular response to abiotic stimulus                                      | 4.38E-04 | 1.40E-02 |
| <a href="#">GO:0043922</a> | negative regulation by host of viral transcription                         | 4.42E-04 | 1.41E-02 |
| <a href="#">GO:0051129</a> | negative regulation of cellular component organization                     | 4.46E-04 | 1.42E-02 |
| <a href="#">GO:0070489</a> | T cell aggregation                                                         | 4.49E-04 | 1.43E-02 |
| <a href="#">GO:0009108</a> | coenzyme biosynthetic process                                              | 4.54E-04 | 1.44E-02 |
| <a href="#">GO:1903050</a> | regulation of proteolysis involved in cellular protein catabolic process   | 4.66E-04 | 1.47E-02 |
| <a href="#">GO:0018209</a> | peptidyl-serine modification                                               | 4.70E-04 | 1.48E-02 |
| <a href="#">GO:0009056</a> | catabolic process                                                          | 4.70E-04 | 1.48E-02 |
| <a href="#">GO:1903037</a> | regulation of leukocyte cell-cell adhesion                                 | 4.81E-04 | 1.51E-02 |

|                            |                                                              |          |          |
|----------------------------|--------------------------------------------------------------|----------|----------|
| <a href="#">GO:1901070</a> | guanosine-containing compound biosynthetic process           | 4.91E-04 | 1.54E-02 |
| <a href="#">GO:0031572</a> | G2 DNA damage checkpoint                                     | 4.96E-04 | 1.55E-02 |
| <a href="#">GO:0048024</a> | regulation of mRNA splicing, via spliceosome                 | 4.98E-04 | 1.55E-02 |
| <a href="#">GO:0042306</a> | regulation of protein import into nucleus                    | 5.08E-04 | 1.58E-02 |
| <a href="#">GO:0071593</a> | lymphocyte aggregation                                       | 5.11E-04 | 1.59E-02 |
| <a href="#">GO:0050863</a> | regulation of T cell activation                              | 5.21E-04 | 1.61E-02 |
| <a href="#">GO:0010216</a> | maintenance of DNA methylation                               | 5.42E-04 | 1.68E-02 |
| <a href="#">GO:0031145</a> | anaphase-promoting complex-dependent catabolic process       | 5.46E-04 | 1.69E-02 |
| <a href="#">GO:0032875</a> | regulation of DNA endoreduplication                          | 5.56E-04 | 1.71E-02 |
| <a href="#">GO:0006221</a> | pyrimidine nucleotide biosynthetic process                   | 5.60E-04 | 1.72E-02 |
| <a href="#">GO:2000781</a> | positive regulation of double-strand break repair            | 5.70E-04 | 1.75E-02 |
| <a href="#">GO:0033046</a> | negative regulation of sister chromatid segregation          | 5.76E-04 | 1.76E-02 |
| <a href="#">GO:0051653</a> | spindle localization                                         | 5.78E-04 | 1.77E-02 |
| <a href="#">GO:0019884</a> | antigen processing and presentation of exogenous antigen     | 5.82E-04 | 1.77E-02 |
| <a href="#">GO:0043393</a> | regulation of protein binding                                | 5.82E-04 | 1.77E-02 |
| <a href="#">GO:0008219</a> | cell death                                                   | 5.90E-04 | 1.79E-02 |
| <a href="#">GO:0031057</a> | negative regulation of histone modification                  | 6.06E-04 | 1.83E-02 |
| <a href="#">GO:0043603</a> | cellular amide metabolic process                             | 6.06E-04 | 1.83E-02 |
| <a href="#">GO:1904589</a> | regulation of protein import                                 | 6.09E-04 | 1.84E-02 |
| <a href="#">GO:1900264</a> | positive regulation of DNA-directed DNA polymerase activity  | 6.14E-04 | 1.85E-02 |
| <a href="#">GO:1900262</a> | regulation of DNA-directed DNA polymerase activity           | 6.14E-04 | 1.84E-02 |
| <a href="#">GO:0030952</a> | establishment or maintenance of cytoskeleton polarity        | 6.17E-04 | 1.85E-02 |
| <a href="#">GO:0009208</a> | pyrimidine ribonucleoside triphosphate metabolic process     | 6.53E-04 | 1.95E-02 |
| <a href="#">GO:0044774</a> | mitotic DNA integrity checkpoint                             | 6.58E-04 | 1.96E-02 |
| <a href="#">GO:0006754</a> | ATP biosynthetic process                                     | 6.63E-04 | 1.97E-02 |
| <a href="#">GO:0032944</a> | regulation of mononuclear cell proliferation                 | 6.65E-04 | 1.98E-02 |
| <a href="#">GO:1903362</a> | regulation of cellular protein catabolic process             | 6.83E-04 | 2.03E-02 |
| <a href="#">GO:0090233</a> | negative regulation of spindle checkpoint                    | 7.02E-04 | 2.08E-02 |
| <a href="#">GO:1900182</a> | positive regulation of protein localization to nucleus       | 7.05E-04 | 2.08E-02 |
| <a href="#">GO:1900180</a> | regulation of protein localization to nucleus                | 7.17E-04 | 2.11E-02 |
| <a href="#">GO:1903504</a> | regulation of mitotic spindle checkpoint                     | 7.41E-04 | 2.18E-02 |
| <a href="#">GO:0090266</a> | regulation of mitotic cell cycle spindle assembly checkpoint | 7.41E-04 | 2.17E-02 |
| <a href="#">GO:0034501</a> | protein localization to kinetochore                          | 7.49E-04 | 2.19E-02 |
| <a href="#">GO:0000706</a> | meiotic DNA double-strand break processing                   | 7.57E-04 | 2.21E-02 |
| <a href="#">GO:0002682</a> | regulation of immune system process                          | 7.64E-04 | 2.23E-02 |
| <a href="#">GO:1903334</a> | positive regulation of protein folding                       | 7.89E-04 | 2.30E-02 |
| <a href="#">GO:0006213</a> | pyrimidine nucleoside metabolic process                      | 7.94E-04 | 2.30E-02 |
| <a href="#">GO:0061136</a> | regulation of proteasomal protein catabolic process          | 7.97E-04 | 2.31E-02 |
| <a href="#">GO:1902749</a> | regulation of cell cycle G2/M phase transition               | 8.07E-04 | 2.33E-02 |



|                            |                                                                         |          |          |
|----------------------------|-------------------------------------------------------------------------|----------|----------|
| <a href="#">GO:1902582</a> | single-organism intracellular transport                                 | 8.13E-04 | 2.35E-02 |
| <a href="#">GO:0043067</a> | regulation of programmed cell death                                     | 8.20E-04 | 2.36E-02 |
| <a href="#">GO:0015985</a> | energy coupled proton transport, down electrochemical gradient          | 8.29E-04 | 2.38E-02 |
| <a href="#">GO:0015986</a> | ATP synthesis coupled proton transport                                  | 8.29E-04 | 2.38E-02 |
| <a href="#">GO:0006306</a> | DNA methylation                                                         | 8.32E-04 | 2.38E-02 |
| <a href="#">GO:0006305</a> | DNA alkylation                                                          | 8.32E-04 | 2.38E-02 |
| <a href="#">GO:0010822</a> | positive regulation of mitochondrion organization                       | 8.39E-04 | 2.39E-02 |
| <a href="#">GO:0032239</a> | regulation of nucleobase-containing compound transport                  | 8.42E-04 | 2.40E-02 |
| <a href="#">GO:0007159</a> | leukocyte cell-cell adhesion                                            | 8.58E-04 | 2.44E-02 |
| <a href="#">GO:0010604</a> | positive regulation of macromolecule metabolic process                  | 8.68E-04 | 2.46E-02 |
| <a href="#">GO:0070663</a> | regulation of leukocyte proliferation                                   | 8.91E-04 | 2.52E-02 |
| <a href="#">GO:0002521</a> | leukocyte differentiation                                               | 8.92E-04 | 2.52E-02 |
| <a href="#">GO:0009132</a> | nucleoside diphosphate metabolic process                                | 8.94E-04 | 2.52E-02 |
| <a href="#">GO:0000278</a> | mitotic cell cycle                                                      | 9.00E-04 | 2.53E-02 |
| <a href="#">GO:0070486</a> | leukocyte aggregation                                                   | 9.08E-04 | 2.55E-02 |
| <a href="#">GO:1901970</a> | positive regulation of mitotic sister chromatid separation              | 9.10E-04 | 2.55E-02 |
| <a href="#">GO:0045069</a> | regulation of viral genome replication                                  | 9.17E-04 | 2.56E-02 |
| <a href="#">GO:0090311</a> | regulation of protein deacetylation                                     | 9.33E-04 | 2.60E-02 |
| <a href="#">GO:0042981</a> | regulation of apoptotic process                                         | 9.33E-04 | 2.60E-02 |
| <a href="#">GO:0061640</a> | cytoskeleton-dependent cytokinesis                                      | 9.34E-04 | 2.59E-02 |
| <a href="#">GO:0006611</a> | protein export from nucleus                                             | 9.48E-04 | 2.63E-02 |
| <a href="#">GO:0006650</a> | glycerophospholipid metabolic process                                   | 9.51E-04 | 2.63E-02 |
| <a href="#">GO:0043903</a> | regulation of symbiosis, encompassing mutualism through parasitism      | 9.57E-04 | 2.64E-02 |
| <a href="#">GO:0046649</a> | lymphocyte activation                                                   | 9.62E-04 | 2.65E-02 |
| <a href="#">GO:0043241</a> | protein complex disassembly                                             | 9.69E-04 | 2.67E-02 |
| <a href="#">GO:0009262</a> | deoxyribonucleotide metabolic process                                   | 9.77E-04 | 2.68E-02 |
| <a href="#">GO:0051173</a> | positive regulation of nitrogen compound metabolic process              | 9.81E-04 | 2.69E-02 |
| <a href="#">GO:0045935</a> | positive regulation of nucleobase-containing compound metabolic process | 9.94E-04 | 2.72E-02 |
| <a href="#">GO:0006166</a> | purine ribonucleoside salvage                                           | 9.97E-04 | 2.72E-02 |
